1 **TITLE**

2 **Recognition of HIV-1 Capsid Licenses Innate Immune Response to Viral Infection.**

3 **AUTHORS**

4 Sunnie M Yoh<sup>1†\*</sup>, João I. Mamede<sup>2,7†</sup>, Derrick Lau<sup>3^</sup>, Narae Ahn<sup>1^</sup>, Maria T Sánchez-Aparicio<sup>4,7</sup>,  
5 Joshua Temple<sup>5</sup>, Andrew Tuckwell<sup>3</sup>, Nina V. Fuchs<sup>6</sup>, Gianguido C. Cianci<sup>2</sup>, Laura Riva<sup>11</sup>, Heather  
6 Curry<sup>1</sup>, Xin Yin<sup>12</sup>, Stéphanie Gambut<sup>7</sup>, Lacy M. Simons<sup>13, 14</sup>, Judd F. Hultquist<sup>13, 14</sup>, Renate König<sup>6</sup>,  
7 Yong Xiong<sup>5</sup>, Adolfo García-Sastre<sup>4,8,9,10</sup>, Till Böcking<sup>3</sup>, Thomas J. Hope<sup>2</sup>, Sumit K. Chanda<sup>1†\*</sup>.

8 **AFFILIATION**

9 <sup>1</sup>Sanford Burnham Prebys Medical Discovery Institute, 10901 N. Torrey Pines Rd., La Jolla, CA  
10 92116.

11 <sup>2</sup> Department of Cell and Developmental Biology, Feinberg School of Medicine, Northwestern  
12 University, 303 E superior., Chicago, IL60611.

13 <sup>3</sup>EMBL Australia Node in Single Molecule Science, School of Medical Sciences, University of New  
14 South Wales, 2052 Kensington, Sydney, Australia.

15 <sup>4</sup>Department of Microbiology, Icahn School of Medicine at Mount Sinai, 1 Gustave L. Levy Place,  
16 New York, NY10029.

17 <sup>5</sup>Yale University, 333 Cedar Street, New Haven, CT 06520-8024.

18 <sup>6</sup>Host Pathogen Interaction (NG3), Paul-Ehrlich-Institut, Paul-Ehrlich-Strasse 51-59  
19 Langen, Germany, 63225.

20 <sup>7</sup>Department of Microbial Pathogens and Immunity, Rush University Medical Center, Chicago, IL,  
21 USA.

22 <sup>8</sup>Global Health and Emerging Pathogens Institute, Icahn School of Medicine at Mount Sinai, 1  
23 Gustave L. Levy Place, New York, NY10029.

24 <sup>9</sup>Department of Medicine, Division of Infectious Diseases, Icahn School of Medicine at Mount  
25 Sinai, 1 Gustave L. Levy Place, New York, NY10029

26 <sup>10</sup>Global Health and Emerging Pathogens Institute, Icahn School of Medicine at Mount Sinai, 1  
27 Gustave L. Levy Place, New York, NY10029.

28 <sup>11</sup>Calibr, a division of The Scripps Research Institute, 11119 North Torrey Pines Road, La Jolla,  
29 CA92037.

30 <sup>12</sup>State Key Laboratory of Veterinary Biotechnology, Harbin Veterinary Research Institute,  
31 Chinese Academy of Agricultural Sciences, Harbin 150069, P.R. China.

32 <sup>13</sup>Department of Medicine, Division of Infectious Diseases, Northwestern University Feinberg  
33 School of Medicine, Chicago, IL, 60611, USA.

34 <sup>14</sup>Center for Pathogen Genomics and Microbial Evolution, Institute for Global Health,  
35 Northwestern University Feinberg School of Medicine, Chicago, IL 60611, USA.

36

37 <sup>†</sup>Equal contribution.

38 <sup>^</sup>Equal contribution.

39 <sup>\*</sup>Correspondence: [schanda@sbpdiscovery.org](mailto:schanda@sbpdiscovery.org) & [syoh@sbpdiscovery.org](mailto:syoh@sbpdiscovery.org)

40 <sup>!</sup>Lead Contact: [schanda@sbpdiscovery.org](mailto:schanda@sbpdiscovery.org)

41

## 42 **SUMMARY**

43 Cyclic GMP-AMP synthase (cGAS) is a primary sensor of aberrant DNA that governs an innate  
44 immune signaling cascade, leading to the induction of the type-I interferon response. We have  
45 previously identified polyglutamine binding protein 1, PQBP1, as an adaptor molecule required  
46 for cGAS-mediated innate immune response of lentiviruses, including the human  
47 immunodeficiency virus 1 (HIV-1), but dispensable for the recognition of DNA viruses. HIV-1-  
48 encoded DNA is synthesized as a single copy from its RNA genome, and is subsequently  
49 integrated into the host chromatin. HIV-1 then produces progeny through amplification and

50 packaging of its RNA genome, thus, in contrast to DNA viruses, HIV-1 DNA is both transient and  
51 of low abundance. However, the molecular basis for the detection and verification of this low  
52 abundance HIV-1 DNA pathogen-associated molecular pattern (PAMP) is not understood. Here,  
53 we elucidate a two-factor authentication strategy that is employed by the innate immune  
54 surveillance machinery to selectively respond to the low concentration of PAMP, while discerning  
55 these species from extranuclear DNA molecules. We find that, upon HIV-1 infection, PQBP1  
56 decorates intact viral capsid, which serves as a primary verification step for the viral nucleic acid  
57 cargo. As the reverse transcription and capsid disassembly initiate, cGAS protein is then recruited  
58 to the capsid in a PQBP1-dependent manner, enabling cGAS molecules to be co-positioned at  
59 the site of PAMP generation. Thus, these data indicate that PQBP1 recognition of the HIV-1  
60 capsid sanctions a robust cGAS-dependent response to a limited abundance and short-lived DNA  
61 PAMP. Critically, this illuminates a molecular strategy wherein the modular recruitment of co-  
62 factors to germline encoded pattern recognition receptors (PRRs) serves to enhance repertoire  
63 of pathogens that can be sensed by the innate immune surveillance machinery.

64

## 65 **KEYWORDS**

66 PQBP1, cGAS, HIV-1 Capsid, Innate sensing, Two-factor authentication, Uncoating

67

## 68 **INTRODUCTION**

69 The cGAS signaling pathway has been established as a critical regulator of the innate immune  
70 response to cytoplasmic DNA (Ablasser and Chen, 2019; Chin, 2019; Reinert et al., 2016).  
71 Signaling can be induced by cytosolic delivery of exogenous double stranded (ds) DNA longer  
72 than 50 nucleotides in length (Gao et al., 2013; Paludan and Bowie, 2013). Upon binding to  
73 dsDNA, cGAS synthesizes cyclic GMP-AMP dinucleotide (cGAMP) which serves as a second  
74 messenger to induce STING-mediated IRF3/type-I IFN signaling (Gao et al., 2013). Interestingly,  
75 cGAS can also sense lentiviral infections, but unlike DNA viruses, requires an adaptor protein,

76 PQBP1 (Yoh et al., 2015). Recently, the non-POU domain-containing octamer-binding protein  
77 (NONO) has been implicated in the innate sensing of nuclear HIV DNA (Lahaye et al., 2018).

78         The HIV-1 capsid, a protein shell composed of oligomeric structural capsid proteins (CA),  
79 encapsulates viral proteins and the RNA genome (Rankovic et al., 2017). After the virion entry  
80 into cytosol, capsid initiates the progressive disassembly of CA through a poorly defined process  
81 of uncoating (Campbell and Hope, 2015; Pornillos et al., 2011). The CA structure continues to  
82 disassemble as the viral reverse transcription complex (RTC) migrates to the nucleus (Burdick et  
83 al., 2020; Hulme et al., 2011; Mamede et al., 2017; Sood et al., 2017). The initiation of capsid  
84 disassembly process is linked to the early steps of reverse transcription, which commences with  
85 the first (-) strand cDNA synthesis and is completed with second (+) strand synthesis (Christensen  
86 et al., 2020; Hu and Hughes, 2012; Hulme et al., 2011; Mallery et al., 2018; Mamede et al., 2017;  
87 Rankovic et al., 2018; Rankovic et al., 2017; Soliman et al., 2017). The HIV-1 DNAs can serve as  
88 a pathogen-associated molecular pattern (PAMP) to activate cGAS (Cosnefroy et al., 2016;  
89 Doitsh et al., 2010; Yoh et al., 2015). Upon the completion of reverse transcription, the DNA is  
90 then integrated into the host genome, where it becomes indistinguishable from chromosomal DNA.  
91 Only viral RNA nucleic acid species, biochemically indistinct from host RNAs, are present during  
92 subsequent steps of the viral life cycle. Thus, in contrast to DNA viruses which amplify copies of  
93 their DNA genomes upon infection, HIV-1 only produces one copy of DNA molecule per reverse  
94 transcription competent virion (Hu and Hughes, 2012), and its availability for innate sensing is  
95 temporally and spatially constricted as the HIV RTC transits to the nucleus and HIV DNA  
96 integrates into host chromatin. The molecular basis of how immune system can sense these  
97 transient and low-copy lentiviral DNA species, but not low-abundance self-DNAs, including  
98 extranuclear DNAs from mitochondrial or nuclear leakage, is not completely understood.

99         In this report, we find that the innate sensing machinery employs a unique molecular  
100 strategy to license innate immune response through a two-step authentication process. First,  
101 retrovirus-specific innate co-sensor PQBP1 specifically recognizes intact capsids of incoming

102 HIV-1 viral particles. Subsequently, disassembly of the viral capsid triggers the PQBP1-  
103 dependent recruitment of cGAS in a NONO-independent manner, enabling enzymatic activation  
104 of the sensor upon the initiation of HIV DNA production. Thus, PQBP1 recognition of the HIV-1  
105 capsid is the proximal event that serves to distinguish its cargo from self-nucleic acids, through  
106 licensing the recruitment of cGAS at the site of PAMP generation. Importantly, this molecular  
107 strategy reveals that modular engagement of co-factors to PRRs can enable the innate immune  
108 surveillance machinery to respond to an enhanced repertoire of pathogen-encoded PAMPs, while  
109 limiting deleterious responses to host genome-encoded DNA molecules.

110

## 111 **RESULTS**

### 112 **PQBP1 colocalizes with capsid of incoming virions during the early steps of infection.**

113 To better understand the spatial dynamics of HIV-1 innate immune recognition and response, we  
114 utilized super-resolution 3D-SIM microscopy to assess PQBP1 association with incoming HIV-1  
115 virions. Briefly, PMA-differentiated THP-1 cells (PMA-THP-1) were infected with HIV-1 viruses  
116 labeled with Gag-Integrase (IN)-mRuby3 (Dharan et al., 2017; Hulme et al., 2015; Mamede et al.,  
117 2017) and one hour post fusion, the cells were fixed and stained by immunofluorescence (IF)  
118 against PQBP1 protein (green; Figure 1A). Colocalization of PQBP1 with virus particles (IN-  
119 mRuby3; red) was assessed by measuring the distance from each IN-labeled virus puncta to its  
120 nearest neighbor PQBP1 dot centroid (Figure 1B; Figure S1). The distribution of IN-PQBP1  
121 nearest neighbor distances ( $d$ ) is shown in blue (Figure 1B), which harbored a sharp peak at  
122 shorter distances ( $\sim 0.12 \mu\text{m}$ ) and a broad shoulder at distances larger than  $0.5 \mu\text{m}$ , indicating two  
123 distinctive populations. For comparison, we performed *in silico* randomized labeling of IN and  
124 PQBP1 signals and calculated the  $d$  distribution (magenta line, left, Figure 1B). The randomized  
125 distribution displayed a single broad peak at  $0.8\text{-}0.9 \mu\text{m}$ , which indicates the observed PQBP1-IN  
126 colocalization peak is unlikely due to stochasticity, while the observed broad shoulder ( $0.5 \mu\text{m}$ )

127 most likely represents INs that are not colocalizing with PQBP1. To quantify the observed  
128 colocalization, we compared the cumulative probability distribution of  $d$  across a range of  
129 thresholds to ascertain colocalization frequencies (right, Figure 1B; Figure S1D; see  
130 Supplemental Text for detail). At a threshold of 0.4  $\mu\text{m}$ , we find that more than 40% of total INs  
131 are colocalizing with PQBP1, compared to less than 9% for the randomized data (right, Figure  
132 1B). Taken together, at thresholds established below 1  $\mu\text{m}$ , these data indicate that PQBP1  
133 significantly colocalizes with incoming HIV-1 virions.

134 HIV-1 capsid is composed of ~1500 copies of CA monomers that self-assemble into  
135 lattices of hexamers and pentamers to form fullerene-like cones (Perilla and Gronenborn, 2016;  
136 Pornillos et al., 2011; Summers et al., 2019). The lattice serves as a binding platform for numerous  
137 cellular factors; thus, HIV-1 capsid defines a critical host-pathogen interface after cellular entry  
138 (Campbell and Hope, 2015; James and Jacques, 2018; Novikova et al., 2019; Summers et al.,  
139 2019). Since PQBP1 was found to colocalize with incoming virus particles, we examined if there  
140 was a direct interaction between recombinant purified PQBP1 and cross-linked CA tubes that  
141 recapitulates the hexameric lattice found in virions [right, Figure 1C; (Mattei et al., 2016)]. Due to  
142 their size (~50 nm in diameter and ~500 nm in length), CA tubes become insoluble upon assembly,  
143 which can be utilized to probe a cellular factor binding by co-sedimentation [left, Figure 1C;  
144 (Summers et al., 2019)]. We find that PQBP1, but not a negative control maltose binding protein  
145 (MBP), specifically co-pelleted with CA tubes (compare lane 13 & 14), and this association could  
146 be disrupted in high-salt condition (compare lanes 14 & 15). These data indicate a biochemical  
147 association of PQBP1 for CA tubes that corroborates their colocalization within the infected cells.

148 **PQBP1 directly interacts with HIV-1 capsids through its amino-terminus.**

149 To date, at least four binding sites on the capsid have been identified for host factor binding: (1)  
150 the CypA binding loop (residues 85-95, also recognized by Nup358), (2) the FG-binding site  
151 located between adjacent CA subunits centered at residue 74 in the hexamer recognized by

152 CPSF6 and Nup153, (3) the R18 residues of six CA subunits that forms an electropositive pore  
153 in the center of the hexamer/pentamer as a binding site for polyanions including dNTPs, IP6 and  
154 the host protein FEZ1, and (4) the electronegative inter-hexamer junction at the three fold  
155 symmetry of the capsid lattice that recruits the antiviral protein MxB (Bhattacharya et al., 2014;  
156 Gamble et al., 1996; Mallery et al., 2018; Price et al., 2014; Smaga et al., 2019). We then sought  
157 to delineate the binding interface between capsid and PQBP1 utilizing two-color coincidence  
158 detection (TCCD). This technique measures fluorescence intensity fluctuations from both cross-  
159 linked CA A204C self-assembled particles, labeled with AF568, and capsid-binding proteins,  
160 labeled with AF488, diffusing through the confocal volume (Figure 2A, orange and green traces  
161 respectively; Figure S2;(Lau et al., 2021; Lau et al., 2019)). Accumulation of binders on the capsid  
162 results in the appearance of fluorescence peaks in the binder trace that coincide with the capsid  
163 peak (Figure 2A, middle; Figure S2B), whereby the variation in the peak amplitudes is due to the  
164 heterogeneity in the size of the *in vitro* assembled capsid particles. As a control, we assessed the  
165 binding of a CPSF6 peptide comprising the capsid-binding residues (Bhattacharya et al., 2014;  
166 Lau et al., 2019; Price et al., 2014) to CA A204C particles (Figure 2B). Consistent with previously  
167 published data, we observed a significant reduction in CPSF6 binding to the N74D capsid mutant  
168 that disables the FG binding site in comparison to the strong binding to WT and R18G capsid  
169 mutant (Mallery et al., 2018). Additionally, the CPSF6-capsid interaction was not competed off by  
170 hexacarboxybenzene (HCB), a polyanion that binds to the R18 ring (HCB; Figure 2A, bottom,  
171 Figure 2B, Figure S2C; (Jacques et al., 2016)). In contrast, fluorescein-dATP, which also binds to  
172 R18 ring, was competed off in the presence of HCB and failed to associate with R18G mutant  
173 capsid (Figure 2B, Figure S2; (Jacques et al., 2016)). Importantly, we observed that PQBP1,  
174 which was directly conjugated with AF488 at the C60 residue, bound robustly to labeled CA  
175 A204C particle, as well as the CA A204C particles bearing the N74D mutation; however, PQBP1  
176 was effectively competed off by HCB and failed to bind to the R18G mutant (Figure 2B, Figure  
177 S2C). Lastly, we find that the N-terminal domain (residues 1 to 46) of PQBP1, which has a cluster

178 of negatively charged residues, showed greater accumulation on CA particles than the C-terminal  
179 portions of the protein (residues 47-265; Figure 2C; Figure S2C). Taken together, these results  
180 suggest that the N-terminal region of PQBP1 and the ring of R18 residues of the capsid make  
181 critical contributions to the viral-host interface.

182 To corroborate these *in vitro* binding studies, the association between capsid binding  
183 domain of PQBP1 and incoming viral cores in the infected cells was assessed by a fluorescence  
184 resonance energy transfer (FRET) assay. The strong affinity of CypA-DsRed protein to the HIV-  
185 1 capsid enables the protein to be specifically packaged into virions during the viral production  
186 and remains bound to the capsid surface post fusion (Francis et al., 2016; Francis and Melikyan,  
187 2018; Sood et al., 2017). We reasoned that if the PQBP1-eYFP fusion protein is indeed recruited  
188 to the capsid, it should be in close proximity (< 10 nm) to capsid bound CypA-DsRed, allowing for  
189 FRET between the eYFP and DsRed fluorophores. Indeed, THP-1 cells stably expressing eYFP  
190 fused PQBP 1-104 or 1-46 proteins (blue) showed higher FRET signals (green) compared to YFP  
191 alone (Figure 2D). The FRET signal of each infected sample was normalized by the background  
192 signal from the corresponding uninfected sample [(Francis et al., 2016; Francis and Melikyan,  
193 2018; Sood et al., 2017); see Star Method]. The distribution of normalized FRET values of both  
194 PQBP1 expressing cells were clearly distinctive and shifted to higher values from that of cells  
195 expressing eYFP alone (Figure 2E). As a control, we observed that the distribution of DsRed  
196 signals was equivalent among the infected THP-1 cells being subjected to the analysis confirming  
197 comparable infection level (Figure S2D). This observation recapitulates the *in vitro* association of  
198 PQBP1 and cGAS in the cytoplasm during the infection. In summary, these data from orthogonal  
199 assays support that PQBP1 directly associates with the assembled capsid and this interaction is  
200 likely mediated through the N-terminus of PQBP1.

201 **PQBP1 is required for cGAS recruitment to incoming virus particles.**



202 We have previously demonstrated that a physical interaction of PQBP1 with cGAS is essential for  
203 the innate sensing of HIV-1 infection (Yoh et al., 2015). We hypothesized that cGAS is tethered  
204 to incoming virus particles via PQBP1 directly associating with the viral capsid. To address this  
205 hypothesis, we have performed super-resolution 3D-SIM IF to exam cGAS association with  
206 incoming virus particles during the early-state of post-fusion viral infection (Figure 3A; Figure S3A;  
207 see Method). Assessing the puncta overlap between IN-mRuby3 (virus) and the associating  
208 proteins, we observed only a fraction of INs co-associated with cGAS upon 1 hr of post-infection  
209 (~8% on average compared to ~60 % for PQBP1); yet, majority of cGAS molecules associating  
210 with INs were also associated with PQBP1 (bottom, Figure 3A). Next, we examined the kinetics  
211 of PQBP1 and cGAS recruitment to incoming virus particles (RTCs), utilizing a virus containing  
212 GFP as the fluid phase marker (HIV-iGFP) to monitor the core after the fusion. Soon after the  
213 fusion of the virus with the cellular membrane, the HIV-1 core changes in a way that allows the  
214 encapsulated GFP to leak out due to the loss of core integrity (Chen et al., 2007; Hubner et al.,  
215 2007; Hubner et al., 2009; Mamede et al., 2017). This loss of integrity is dependent on the process  
216 of reverse transcription where the blocking of the initiation or the first strand transfer of the reverse  
217 transcription delays the initiation of capsid disassembly (Cosnefroy et al., 2016; Mamede et al.,  
218 2017). We utilized this system to stage the progression of the cytoplasmic HIV complexes and  
219 the state of capsid. Upon the loss of capsid integrity, the viral DNAs being generated by ongoing  
220 reverse transcription are likely to become accessible to cGAS. By infecting MDDCs with the HIV-  
221 1 virus dual-labeled with iGFP and Gag-Integrase (IN)-mRuby3, we combined live cell imaging to  
222 monitor the state of the capsid core of each virus particle within the infected cells, followed by  
223 timed fixation and immuno-staining against PQBP1 and cGAS to determine the level of their  
224 association with each RTC (Figure 3B). For the analysis, each intracellular (IN)-mRuby3 complex  
225 was categorized based on the characteristic iGFP stepwise signal decay: (1) unfused (no loss of  
226 iGFP), (2) fused but retaining an intact capsid (partial loss of iGFP), and (3) after fusion with loss  
227 of capsid integrity (complete loss of iGFP) (Video S1; Figure S3B; iGFP panel, Figure 3B). PQBP1

228 and cGAS association with each virus particle was then quantified by post-fixation  
229 immunostaining of PQBP1 and cGAS, followed with spatial correlation to IN foci (individual panels  
230 and quantification graphs in Figure 3B & Figure S3B). We found that PQBP1 associated with post-  
231 fusion particles regardless of whether the capsid was intact or open, while most cGAS co-  
232 localized only after loss of capsid integrity.

233         The temporal disparity between PQBP1 and cGAS recruitment to the capsid suggests a  
234 mechanism wherein PQBP1 and capsid association is a prerequisite for cGAS recruitment. These  
235 results also suggest that binding of PQBP1 to capsid is not sufficient to recruit cGAS, but that loss  
236 of capsid integrity associated with reverse transcription progression licenses PQBP1 recruitment  
237 of cGAS to the HIV complexes. Since genetic ablation of PQBP1 is incompatible with cell viability  
238 (Iwasaki and Thomsen, 2014; Tamura et al., 2013; Yoh et al., 2015), we transiently depleted  
239 PQBP1 from THP-1 cells, and evaluated the frequency of cGAS association with the virus  
240 particles (Figure 3C). Reduction of PQBP1 protein in cells was confirmed by a decrease in both  
241 PQBP1 mRNA and its protein level (Figure S3C, top). Importantly, down-regulation of PQBP1  
242 resulted in a marked decrease in cGAS association per virus particle (Figure 3C), as well as a  
243 marked drop in the fraction of virus particles that are targeted by cGAS (Figure 3D) without a  
244 significant overall reduction of cGAS protein levels (Figure S3C bottom). Consistent with a model  
245 wherein cGAS is specifically concentrated to PQBP1-decorated virions, we observed that a  
246 significantly higher density of cGAS foci is present in the vicinity of virions when compared to the  
247 randomly distributed ones in the cytoplasm (data not shown). Lastly, we addressed the  
248 contribution of the PQBP1/cGAS/capsid complex formation for the innate immune response to  
249 HIV-1 infection by assessing cGAS activation through visualization of cGAMP levels (green) in  
250 cells (Hall et al., 2017). THP-1 cells, either infected with HIV-1 or transfected with HT-DNA for 3  
251 hours followed by immunostaining, revealed cGAMP staining in the challenged cells that are  
252 analogous to the ones where cGAMP molecules were transfected (Figure S3D). Consistent with  
253 a robust induction of cGAMP, we also observed a nuclear localization of IRF3, a hallmark of the

254 cGAS/IRF3 pathway activation, in the challenged cells (IRF3 panel, Figure S3D). Accordingly, a  
255 selective depletion of PQBP1 resulted in a marked decrease in the cGAMP level in response to  
256 HIV-1 challenge, reconfirming the PQBP1 dependency for the cGAS activation (Figures 3D and  
257 S3E).

258       Previously, Lahaye et. al. have shown that NONO associates with nuclear HIV capsids  
259 and is needed for innate immune responses upon HIV infection in MDDCs (Lahaye et al., 2018).  
260 Consistent with results reported by Lahaye et. al., we observe HIV-1 infection induces cGAS  
261 signaling in a NONO-dependent manner in MDDCs (Figures 4A and S4A). However, we find that  
262 NONO depletion in THP-1 cells, which maintain an intact innate response to HIV (Collins et al.,  
263 2015; Gao et al., 2013; Sumner et al., 2020; Sun et al., 2013; Wisner et al., 2020; Yoh et al., 2015),  
264 has no significant effect on innate immune response to HIV-1 (with Vpx), as well as HIV-2, infection  
265 (Figures 4B). In attempt to determine whether NONO participates in the initial recognition of  
266 incoming virus particles in MDDCs, we evaluated the frequency of NONO association with  
267 incoming HIV-1 virions. The distributions of nearest neighbor distance analysis revealed that IN  
268 and NONO association displayed a single broad peak at  $\sim 0.9 \mu\text{m}$  (blue lines, Top) that is similar  
269 to the distribution of the random curve generated upon the *in silico* shuffling of the foci coordinates  
270 (magenta, Top, Figure 4C). In contrast, IN to PQBP1 distance distribution showed a distinctive  
271 peak at  $< \sim 0.5 \mu\text{m}$  (blue lines, Bottom) which represents INs that are colocalizing with PQBP1,  
272 separating away from the randomized shuffling of the coordinates (magenta, Bottom, Figure 4C;  
273 see Figure 1 also). At a threshold of  $0.5 \mu\text{m}$ , we find that  $\sim 8 \%$  of INs associate with NONO  
274 (similar to the level of randomized control) while  $\sim 23\%$  of INs do with PQBP1 (Bottom left, Figure  
275 4C). These data indicate that NONO does not significantly colocalize with incoming virus particles  
276 (INs) as PQBP1 does in MDDCs.

277       Next, we examined whether NONO is required for cGAS recruitment to incoming virus  
278 particles. Analogous to Figure 3A, the puncta overlap between IN-mRuby3 (virus) and cGAS

279 signals were assessed in the infected MDDCs and determined % of total INs positive of cGAS  
280 signal. We observed that depletion of NONO had no noticeable impact on cGAS co-association  
281 with INs (Figure 4D; Figure S4B). Similarly, we find that NONO depletion did not impact cGAS  
282 association with the viral capsid in THP-1 cells as well. Specifically, a proximal ligation assay  
283 between Flag-cGAS, stably expressing, and p24 CA in the infected THP-1 cells confirms that  
284 NONO is dispensable for the cGAS recruitment to incoming capsids (Figure 4E; Figure S4C).  
285 Lastly, we confirmed that loss of NONO did not impact cGAMP production in MDDCs upon HIV-  
286 1 (Figure 4F; Figure S5C). Taken together, these data suggest that, in certain cellular contexts,  
287 NONO is dispensable for the innate response to HIV. Moreover, these results also indicate that  
288 NONO does not participate in the recruitment of cGAS to incoming HIV-1 capsid and its  
289 subsequent enzymatic activation.

290 **PQBP1 interaction with capsid licenses cGAS sensing of HIV-1 infection.** Upon observation  
291 of PQBP1/cGAS complex assembly on HIV-1 capsid, we asked whether the capsid could serve  
292 as a platform where PQBP1 and cGAS interaction can be facilitated. Immunofluorescence (IF)  
293 based colocalization analysis revealed that HIV-1 infection selectively enhanced PQBP1 and  
294 cGAS co-association whereas a direct activation of cGAS by herring-testis (HT) DNA did not  
295 (Figure 5A). Briefly, the colocalization analysis was determined with three-dimensional detection  
296 of spots, performing image segmentation. We utilized a threshold distance of 0.4  $\mu\text{m}$  to define the  
297 interaction between both molecules. We observed a seven-fold increase in the frequency of  
298 PQBP1-cGAS colocalization for HIV-1 infected cells, while no enhancement in association was  
299 observed in cells transfected with HT-DNA, an established cGAS ligand (right, Figure 5A).  
300 Complementing the IF result, we also demonstrated that PQBP1 co-precipitated with cGAS more  
301 efficiently in the presence of HIV-1 infection but not in the HT-DNA treatment compared to the no  
302 treatment control of both MDDCs and PMA-THP-1 cells (Figure 5B). A systematic truncation  
303 analysis on PQBP1 protein confirmed that cGAS interaction surface is distinctive from the capsid

304 interaction domain (Figure S5A). Briefly, either full-length or truncated PQBP1-YFP proteins was  
305 over-expressed with MBP-tagged cGAS proteins in 293T cells and subjected to co-  
306 immunoprecipitation assays (coIPs). A mutant PQBP1 that lacked the capsid binding domain of  
307 first 46 amino acids (aa 47-265) co-precipitated with MBP-cGAS as efficiently as the full-length  
308 (aa 1-265), yet the capsid-associating N-terminal domains of PQBP1 (aa 1-46, as well as aa 1-  
309 104) failed to do so (Figure S5A). Previously we have shown that a point mutation within the WW  
310 domain (aa 47-86) of PQBP1 impair cGAS interaction; however, we observed that the N-terminal  
311 fragment containing WW domain (aa 1-104) is not sufficient but need additional c-terminal regions  
312 to bind to cGAS [compare aa 1-104 with aa 1-211 in Figure S5; (Yoh et al., 2015)]. Collectively,  
313 the reciprocal result of the coIP suggests that two distinctive interaction surfaces exist within  
314 PQBP1, one for capsid and the other for cGAS interaction.

315 We found that the first 46 a.a. of PQBP1, which excludes cGAS binding surface, is  
316 sufficient to bind to capsid in cells (Figure 2D-E). We next asked whether this domain possesses  
317 a dominant negative impact on cGAS sensing of HIV-1 infection by potentially competing off  
318 endogenous PQBP1 bound to capsid, and in turn reducing cGAS recruitment to the virus particles.  
319 Ectopic expressions of 1-46 and 1-104 aa of PQBP1 inhibited ISG54 mRNA induction to HIV-1  
320 infection compared to the responses from the cells expressing YFP alone (left, Figure 5C). This  
321 observed effect was specific to HIV-1 infection, since the inhibition was not apparent with Sendai  
322 virus infection (right, Figure 5C). Reciprocally, THP-1 cells expressing a mutant PQBP1 that  
323 lacked the capsid binding surface (residues 47-265) but retained cGAS interaction (Figure S6A)  
324 were impaired in ISG54 mRNA induction in response to HIV-1 challenge (Figure 5D),  
325 underscoring the importance of PQBP1 and capsid interaction for cGAS recruitment and innate  
326 sensing of HIV-1 infection.

## 327 **DISCUSSION**

328 In this study, we find that the assembled capsid lattice acts as a preliminary PAMP that serves to  
329 authenticate incoming viral nucleic acid cargo. Specifically, we find that PQBP1 recognition of the  
330 multimerized capsid lattice, likely at the positively charged arginine ring in the CA, acts as an initial  
331 PAMP engagement step that initiates an innate immune program. Consistent with this finding, we  
332 do not observe significant interaction between PQBP1 and monomeric CA proteins (data not  
333 shown). Importantly, the charged pore structure is highly conserved among the capsids of the  
334 lentivirus family (Mallery et al., 2019), which is consistent with our previous observation where  
335 PQBP1 is a lentivirus specific co-factor for cGAS sensing of viral DNA. The intact capsid cone  
336 has estimated ~250 CA protein hexamers plus twelve pentamers that would provide numerous  
337 binding sites for the accumulation of PQBP1 molecules (Perilla and Gronenborn, 2016; Pornillos  
338 et al., 2011). Indeed, *in vitro* binding assays indicated that multiple PQBP1 proteins are bound to  
339 each assembled CA lattice (compare AF488-PQBP1 signal peaks in the absence and presence  
340 of CA-A204C, Figure 2B). Through its heterodimerization with PQBP1-bound capsid, cGAS  
341 becomes co-positioned at the site of PAMP generation. This recruitment functions to license the  
342 second step of the innate immune recognition of lentiviral infection: induction of a vigorous cGAS-  
343 dependent response. This dual-step recognition of both pathogen protein and DNA likely allows  
344 for pathogen sensitivity and specificity to ensure that the activation of IFN pathways is not  
345 spontaneously activated from recognition of each individual PAMP separately, assuring a  
346 powerful yet specific inflammatory response.

347         The prerequisite of PQBP1 binding to capsid suggests that additional events are required  
348 for cGAS recruitment to incoming viral particles. The finding that cGAS is recruited to the PQBP1-  
349 capsid platform only upon the initiation of capsid disassembly (Figure 3B) suggests that molecular  
350 events that may be coupled to disassembly are required for the formation of a competent PRR  
351 complex. These may include conformational changes in PQBP1, oligomerization/activation of  
352 cGAS, progression of reverse-transcription and/or the cytosolic exposure of reverse transcribed  
353 DNA upon the loss of the core integrity (Christensen et al., 2020; Mamede et al., 2017; Manel et

354 al., 2010; Sumner et al., 2020). Insights into the potential nature of the RTC, PQBP1, and cGAS  
355 complex come from various studies. The Inhibition of reverse transcription by nevirapine  
356 treatment blocked both capsid structural integrity loss and innate response (Felts et al., 2011;  
357 Iliina et al., 2012; Mamede et al., 2017; Wang et al., 2021; Yoh et al., 2015). Blocking of the first  
358 strand transfer of the reverse transcription with a RNase H inhibitor (Iliina et al., 2012; Julias et al.,  
359 2002) did not compromise the innate response (data not shown), which suggests that the initiation  
360 of reverse transcription, i.e. production of the strong stop HIV-1 DNA is sufficient to induce cGAS  
361 activation. The coupling between the reverse transcription and capsid disassembly is solidified by  
362 an identification of capsid mutant virus with an accelerated reverse transcription kinetic displaying  
363 faster initiation of capsid disassembly (Sultana et al., 2019). Lastly, cryo-electron tomograph  
364 analysis of the *in vitro* assembled reverse transcription complexes reveals strand-like loops,  
365 believed to be the reverse transcribing DNA extruding out from a disassembling capsid  
366 (Christensen et al., 2020). Collectively, these data underscore the crosstalk among reverse  
367 transcription, capsid disassembly and cGAS mediated innate sensing. Whether the initial  
368 structural changes in capsid triggered by the progression of reverse transcription permits the  
369 recruitment and activation of cGAS, or the availability of the reverse transcribed DNA providing  
370 an additional tether for the process, will need to be investigated.

371         Lahaye et. al. have reported that cGAS sensing of HIV can occur nucleus through binding  
372 of disassembled capsid (Lahaye et al., 2018). In contrast, we have shown that the recognition of  
373 intact capsid of incoming virions in the cytoplasm by the PQBP1/cGAS complex is required for  
374 establishing the innate response to HIV-1, and occurs independently of NONO. These  
375 observations raise the possibility that cytoplasmic and nuclear sensing of HIV may be functionally  
376 coupled through capsid, but PQBP1 detection of incoming HIV-1 is a prerequisite for PAMP  
377 authentication and initiation of innate immune response to viral challenge.

378         Collectively, these data reveal a unique two-factor authentication strategy that enables  
379 cellular immune response to transient and low-abundance retroviral DNA species. PQBP1 binding

380 to HIV-1 capsid is a component of a multi-step sensing process that enables cGAS recruitment  
381 and DNA PAMP recognition, culminating in the initiation of an innate immune response against  
382 HIV-1 infection. This modular association of PQBP1 with the cGAS pattern recognition receptor  
383 triggers a robust response to veritable foreign DNA species, while circumventing self-activation  
384 from extranuclear host-derived DNA. This molecular strategy represents an evolutionary  
385 expedient mechanism to expand the versatility of germline-encoded sensors to mount effective  
386 immune responses across a range of invading pathogens with unique features that associate  
387 them as PAMPs.

### 388 **ACKNOWLEDGEMENTS**

389 The authors would like to thank Zeli Zhang for reagent preparations; SBP Flow Cytometry core  
390 for technical assistance.

### 391 **FUNDING**

392 Research reported in this publication was supported by NIAID of the National Institutes of Health  
393 under award numbers (R01 AI127302-01A1, R01 AI105184-02 Supplement, K22AI140963 and  
394 AI150464) and cFAR Development Grant and CHRP Basic Bio Pilot BB19-SBMR-01,  
395 P50GM082251 and by the German Research Foundation (DFG; SPP1923 Project KO4573/1-2).  
396 90%/\$ 500,000 of the total project costs were financed with Federal funding. 10%/\$ 55,000 of the  
397 total costs were financed with non-Federal funding. The content is solely the responsibility of the  
398 authors and does not necessarily represent the official views of the National Institutes of Health.

### 399 400 **AUTHOR CONTRIBUTIONS**

401 Conceptualization, S.M.Y., J.I.M. and S.K.C; Methodology, S.M.Y., J.I.M. and D.L.; Validation,  
402 A.T.; Formal Analysis, G.C.C., L.R., J.I.M.; Investigation, S.M.Y., J.I.M., D.L., N.A., M.T. S-A.,  
403 J.T., N.H-F.; Resources, H.C., L.S., S.G, J.H.; Writing-Original Draft, S.M.Y, J.I.M., D.L., T.B.;  
404 Writing-Review & Editing, S.K.C., A.G-S., T.H., Y.J., R.K.; Visualization, S.M.Y., J.I.M., T.B.;



405 Supervision, S.K.C., T.H., A.G-S.; Project Administration, S.M.Y.; Funding Acquisition, S.K.C.,  
406 A.G-S., S.M.Y.

407

408

#### **COMPETING INTEREST**

409

Authors declare no completing interests.

410

411

#### **DATA AND MATERIAL AVAILABILITY**

412

All data, code, and materials used in this work are available in the main text or the supplementary  
413 materials and upon request.

414

415

#### **FIGURE LEGENDS**

416 **Figure 1. PQBP1 colocalizes with capsid of incoming virions during the early steps of**

417 **infection.** (A) Single Z image of PMA-differentiated THP-1 cells (PMA-THP-1) infected with HIV-

418 1 virions labeled with Gag-IN-mRuby3 (red). The viral fusion was synchronized and one-hour

419 post-infection, immunostaining of PQBP1 protein (green) was performed. Zoomed images of

420 individual viral particles associating with PQBP1 are shown on the right. (B) Left, distribution of

421 IN-to-PQBP1 nearest neighbor distances (Count). The distribution of experimental data (blue

422 histogram) is compared with the one generated from *in silico* randomized dots (magenta

423 histogram). A kernel density estimate of each distribution is overplotted as a solid curve,

424 represented as Frequency, N=32,033 INs. Right, the cumulative probability of nearest neighbor

425 distance ( $d$ ) measures the percentage of IN dots that have PQBP1 within a defined  $d$ . For example,

426 the percentage of INs that have PQBP1 at  $d < 0.4 \mu\text{m}$  is a 43% of for experimental data and 9%

427 for randomized dots as highlighted by grey dotted lines. (C) CA tube co-pelleting assay. Insoluble

428 cross-linked CA A14C/E45C tubes were incubated together with PQBP1 or maltose binding

429 protein (MBP; Input) and separated into supernatant and pellet fractions (Sup and Pellet,

430 respectively) then analyzed via reducing SDS-PAGE. The data are representative of at least three  
431 independent experiments.

432

433 **Figure 2. PQBP1 directly interacts with HIV-1 capsids through its amino-terminus.** (A)

434 Representative TCCD traces of AF488-PQBP1 (green) and AF568-labeled CA A204C particles

435 (orange). The insets show schematics of the species detected by TCCD with PQBP1 and CA

436 A204C particles represented as green stars and orange cones, respectively. Top, featureless

437 PQBP1 trace due to the diffusion of PQBP1 monomers; middle, coincident peaks in both traces

438 due to co-diffusion of multiple PQBP1 molecules bound to CA particles; bottom, featureless

439 PQBP1 trace due to non-associated diffusion of PQBP1 monomers and CA particles in the

440 presence of HCB. (B) PQBP1 binds to the R18 pore of capsid. TCCD analysis of AF488-PQBP1,

441 AF488-CPSF6<sub>313-327</sub> and fluorescein-dATP to CA A204C particles in the absence and presence

442 of HCB, and to R18G or N74D CA particles. (C) The N-terminal 46 residues of PQBP1 bound

443 strongly to capsid. TCCD binding analysis of GFP fusions of PQBP1<sub>1-46</sub> and PQBP1<sub>47-265</sub> to CA

444 A204C particles in the absence and presence of HCB. Data are representative of at least two

445 independent experiments. One-way ANOVA, \*\*\*\* p<0.0001, ns=no significance. (D)

446 Fluorescence resonance energy transfer (FRET) assay to visualize interaction between PQBP1

447 and capsid of incoming virions. PMA-THP-1 cells stably expressing either eYFP, PQBP1<sub>1-46</sub>-

448 eYFP or PQBP1<sub>1-104</sub>-eYFP (blue) were infected with HIV-1 packaged with CypA-DsRed (red)

449 for 1.5 hours, followed by PFA fixation, imaging, and FRET analysis. Representative images and

450 distributions of FRET values normalized against an uninfected counterpart were shown (see

451 Method for detail). FRET excitation and emission wavelengths for YFP and mCherry are as

452 annotated.  $R_0$  calculated to be 60.98Å (<https://www.fpbases.org/fret/>). Data are representative of

453 at least two independent experiments.

454

455 **Figure 3. PQBP1 is required for cGAS recruitment to incoming virus particles.** (A) cGAS

and PQBP1 association with incoming viral particles. Single Z slice images of PMA-THP-1 cells

456 infected with HIV-1 labeled with Gag-IN-mRuby3 (red) in the presence of VLP-Vpx coinfection for  
457 1 hr, followed by antibody detection of PQBP1 protein (green) and cGAS (blue). Detailed cropped  
458 images of individual viral complexes associating with PQBP1 and cGAS at different levels and  
459 distributions are shown on the right. Fractions of total IN-mRuby3 foci showing association with  
460 PQBP1, cGAS (independently) and simultaneously positive for signals of viral particle, PQBP1,  
461 and cGAS are quantified at the bottom. (B) PQBP1 recruitment to viral particles precedes cGAS  
462 recruitment. MDDCs were infected with HIV-1 labeled with iGFP fluid phase marker and IN-  
463 mRuby3 at low MOI and subjected to a time-lapse imaging for an hour, followed by fixed IF for  
464 PQBP1 and cGAS. Signal intensity of PQBP1/cGAS for each viral particle are quantified and  
465 plotted according to the structural state of capsids, assessed by iGFP signal status (see Method,  
466 bottom graphs). Kruskal Wallis H; KW  $p < 0.001$ ), followed by Dunn's multiple comparisons \*\*\*  
467  $p < 0.001$ , \*\*  $p < 0.01$ . Data represent sum of 2 to 3 independent experiments. (C) PQBP1 is required  
468 for cGAS recruitment to viral particles. Top, PMA-THP-1, treated with either a non-targeting siRNA  
469 (NT) or siRNAs targeting PQBP1 (PQBP1-1 and -2), were infected with HIV-1 viruses (Gag-IN-  
470 mRuby3) for 2.5 hours, followed by fixed imaging for cGAS. NC denotes negative control where  
471 the cells were only stained with secondary antibodies. Mean fluorescence intensity (MFI) of cGAS  
472 signal per viral particle (IN) is quantified. Median and error bar ( $\pm 1.5 \times \text{IQR}$ ) are shown. Box  
473 indicates the interquartile range (IQR). Dunn's column comparison \*\*\*\*  $p < 0.0001$ . Bottom, relative  
474 ratio of viral particles (INs) where co-associating cGAS MFI signals above the maximum value of  
475 NC sample are plotted from the data shown in top graph. All the HIV-1 infections of PMA-THP-1  
476 cells were performed in the presence of VLP-Vpx co-infection. (D) Knockdown of PQBP1 results  
477 in decreased cGAMP production. PMA-THP-1, transfected with non-targeting siRNAs (NT) or  
478 siRNA targeting PQBP1, were challenged with HIV-1 for 2.5 hours and stained for cGAMP (green),  
479 cGAS (red), and dapi (blue). Mean cGAMP signal per cell were graphed (bottom). Median and  
480 Error bar ( $\pm 1.5 \times \text{IQR}$ ) are shown. Box indicates the interquartile range (IQR). Mann-Whitney \*\*\*\*

481  $p < 0.0001$ . Data are representative of three independent infections. All the data presented, unless  
482 otherwise stated, are representatives of at least two independent experiments.

483 **Figure 4. NONO is not required for the PQBP1-dependent cGAS sensing occurring during**  
484 **the early step of the infection.** (A) NONO is required for the HIV-1 infection induced ISG54  
485 induction in MDDCs. Cells targeted by the indicated siRNAs were either mock-treated or infected  
486 with HIV-1 luciferase virus, followed by ISG54 mRNA measurement 16 hrs post infection. (B)  
487 NONO is not required for ISG54 induction against HIV-1 infection in PMA differentiated THP-1  
488 cells. Left, Cells were subjected to CRISPR gene editing with indicated sgRNAs and assessed  
489 for ISG54 mRNA inductions at 16 hours post infection with either mock, HIV-1 in the presence of  
490 VLP-Vpx or HIV-2. Right, the levels of NONO and PQBP1 proteins of the cells targeted with  
491 indicated sgRNAs were shown accordingly. (C) Left, representative image of MDDCs infected  
492 with HIV-1 virus (IN-mRuby3) and stained for PQBP1 (blue) and NONO (green). Right, distribution  
493 of IN-to-NONO (top) or IN-to-PQBP1 (bottom) nearest neighbor distances ( $d$ ). The distribution of  
494 experimental data (blue histograms) is compared with one generated from *in silico* randomized  
495 dots (magenta histograms). A kernel density estimate of each distribution is overplotted as a solid  
496 curve, represented as Frequency,  $N=27,932$  INs. The percentage of INs that have either PQBP1  
497 or NONO at  $d < 0.5 \mu\text{m}$  as well as the values for the randomized controls are graphed bottom left.  
498 (D) NONO depletion does not impair cGAS recruitment to incoming capsids. MDDCs treated with  
499 indicated siRNAs were infected with HIV-1 viruses (Gag-IN-mRuby3/GFP) for 2.5 hours, followed  
500 by immunostaining for cGAS and imaging. Fractions of total IN foci overlap with cGAS signal are  
501 graphed. Mean and SEM are shown. One-way ANOVA, \*\*\*  $p < 0.001$ . The results are based on  
502 and four independent experiments. (E) NONO is not required for cGAS recruitment to capsid in  
503 PMA-THP-1 cells. Efficiency of Flag-cGAS and p24 viral capsid interaction in PMA-THP-1 cells  
504 targeted by indicated siRNAs was determined by a proximal ligation assay (PLA). The cells were  
505 infected with HIV-1 virus in the presence of VLP-Vpx for 2 hrs followed by paraformaldehyde  
506 fixation and PLA. Representative images (left) and quantification (right) of PLA dots (red) per

507 cells are shown. Dapi (blue) and cell boundary (dotted line) are shown. Mean and SEM are shown.  
508 One-way ANOVA, \*\*\*\*  $p < 0.0001$ . ns denotes no significance. (F) cGAMP production upon HIV-1  
509 infection is not impaired by depletion of NONO. MDDCs, transfected with indicated siRNAs, were  
510 challenged with HIV-1 for 2.5 hours and were stained for cGAMP (green) and dapi (blue). Mean  
511 cGAMP signal per cell were graphed (bottom). Mean and SEM are shown. One-way  
512 ANOVA, \*\*  $p < 0.01$ , \*\*\*  $p < 0.001$ , ns denotes no significance. All the data, unless noted otherwise,  
513 are representative of at least two independent experiments.

514 **Figure 5. HIV-1 infection promotes the formation of PQBP1/cGAS innate sensing complex.**

515 HIV-1 infection enhances PQBP1 and cGAS interaction. (A) PMA-THP-1 cells were fixed 2.5  
516 hours post HIV-1 infection (Gag-IN-mRuby) or HT DNA transfection, followed by immunostaining  
517 against PQBP1 and cGAS and for confocal microscopy. Z-section images (left) and the  
518 quantification of the co-association foci (right) are shown. A threshold for colocalization is set at  
519 a distance of 0.4  $\mu\text{m}$ . Averages and SEM are shown. One-way ANOVA, \*\*  $p < 0.01$ , \*  $p < 0.05$ , ns  
520 denotes no significance. (B) HIV-1 infection (+) enhances co-immunoprecipitation of cGAS or  
521 Flag-cGAS with PQBP-IP in MDDCs (left) or PMA-THP-1 (middle and right), respectively. The  
522 cells were infected with HIV-1 luciferase virus in the presence of VLP-Vpx and subjected to co-  
523 IPs at 3 hrs post infection. HT-DNA was delivered to PMA-THP-1 cells instead of the viral infection  
524 and endogenous cGAS co-precipitating with PQBP1 was assayed. 1x and 3 x denote the relative  
525 amounts of inputs loaded on a gel. Normal IgG (NS) or antibody against PQBP1 were used as  
526 indicated. ns denotes non-specific bands. (C) The capsid interaction domain of PQBP1 is a  
527 dominant inhibitor of cGAS-mediated innate sensing of HIV-1 infection. Two independent PMA-  
528 THP-1 cell clones (A and B clones) stably expressing either YFP, PQBP1<sub>1-46</sub>-YFP or PQBP1<sub>1-</sub>  
529 <sub>104</sub>-YFP were infected with HIV-1 luciferase virus in the presence of VLP-Vpx or Sendai virus as  
530 indicated. ISG54 mRNAs were measured 16 hours post infection. (D) The capsid interaction  
531 domain of PQBP1 is needed for innate response against HIV-1 infection. PMA-THP-1 cells either  
532 un-transduced or stably expressing the indicated PQBP1-YFP proteins were treated with siRNA

533 against endogenous PQBP1 (+), followed by HIV-1 infection and ISG54 mRNA detection as in  
534 (C). NT denotes non-targeting siRNA. ISG54 mRNA levels were expressed as a fold induction  
535 over their uninfected counterparts. Expression level of either YFP or PQBP-YFPs in the cells used  
536 in (C) and (D) were determined by anti-GFP/YFP western blots. Equal numbers of cells were  
537 analyzed. T-test (unpaired; two-tailed) \* $p < 0.05$ , \*\* $p < 0.01$ , \*\*\* $p < 0.001$ . All the data, unless noted  
538 otherwise, are representative of at least two independent experiments.

## 539 **STAR METHODS**

### 540 **Reagents**

541 50 – 100 ng of cGAMP (Invivogen) and 2 ng to 10 ng of Herring testis (HT) DNA (Sigma) were  
542 transfected into  $2.5 \times 10^4$  PMA-differentiated THP-1 using Lipofectamine 2000 (Life Technologies).  
543 The following antibodies were used: IRF3 (Cell Signaling D9J5Q), PQBP1 [Bethyl Laboratory  
544 A302-802A; Santa Cruz Biotechnology sc-376039; Sigma Aldrich (1A11)], cGAS [Novus NBP1-  
545 8676; Santa Cruz Biotechnology (D-9); Cayman (5G10); Cell signaling (D1D3G)], normal  
546 rabbit/mouse IgG (Santa Cruz Biotechnology SC-2027),  $\beta$ -actin (Cell Signaling Technology  
547 49705), GFP (Thermo Scientific MA5-15256: Clontech 632592), FLAG (Sigma Aldrich F1804),  
548 p24 (AIDS Reagent 71-31). Anti-cGAMP [PF-07043030 Pfizer (Hall et al., 2017)], Anti-MBP  
549 magnetic beads (NEB).

### 550 **Plasmids, siRNAs and qRT-PCR**

551 Human LentiORF cDNA clones of PQBP1 (Open Biosystems), both wild-type and mutant  
552 constructs, in-frame fused with eYFP proteins, were generated by a standard Gibson cloning  
553 approach, and packaged into lentiviruses according to the manufacturer's protocol. The silent  
554 mutations were introduced to PQBP1-eYFP constructs to render the proteins resistant to  
555 siPQBP1 RNAs as described previously (Yoh et al., 2015). Flag-cGAS is cloned into pEASIL  
556 doxycycline inducible lentivirus vector (a generous gift from M. Malim). MBP-cGAS and 6xHIS-  
557 PQBP1 constructs were cloned into pCDNA 3.1 and pCDFDuet vectors respectively. THP-1 cells,

558 either wildtype or Dual-KO-cGAS (Invivogen) were infected with each lentivirus to generate the  
559 cells with a stable expression of the protein of interest.

560 siRNAs were introduced into PMA-THP-1 cells using Stemfect RNA transfection kits.  
561 Typically, 5 pmol of siRNAs and 0.17  $\mu$ l of Stemfect were used for  $2.5 \times 10^4$  cells. Forty-eight hour  
562 after siRNA transfection, the cells were infected with either HIV-1 virus in the presence of VLP-  
563 VPX (Manel et al., 2010; Yoh et al., 2015) or 2.5 HAU/ml of Sendai virus for 16 hours, followed  
564 by RNA isolation and qRT-PCR analysis. Alternatively, in the case of IF analysis, cells were fixed  
565 2-3 hours post infection. Following siRNAs were used: siNT (5'-AATCGATCATAGGACGAACGC-  
566 3'); siPQBP1-1 (5'- AAGCTCAGAAGCAGTAATGCA-3'); siPQBP1-2 (5'-  
567 AAAGCCATGACAAGTCCGGACA-3'). qPCR primers that were used were previously described  
568 (Yoh et al., 2015).

#### 569 **Cell culture and viral infection**

570 This study was approved by the National Institutes of Health (NIH) through our Institute Biosafety  
571 Committee (IBC). Primary monocyte-derived dendritic cells (MDDCs) were prepared from fresh,  
572 healthy donor blood from the San Diego Blood Bank as described previously (Yoh et al., 2015).  
573 The human monocyte-like THP-1 cell line, grown in RPMI 1640 supplemented with 10% FBS,  
574 was differentiated by treating with 20-40 ng/ml PMA (Phorbol myristate acetate) for 2 days. Both  
575 THP-1 and HEK293T cells were purchased from ATCC. THP-1 Dual and THP-1-Dual KO-cGAS  
576 cells were purchased from Invivogen and maintained in RPMI 1640+10% FBS.

577 MDDCs or PMA-differentiated THP-1 cells were infected with VSV-G pseudo-typed HIV-  
578 1 virus and VLP-Vpx, as described previously (Manel et al., 2010; Yoh et al., 2015) unless  
579 otherwise specified. In general, 2-10 ng of p24 or 0.1 to 0.5 RT unit of HIV-1 viruses were used  
580 per 25K cells in 100  $\mu$ l of media and harvested between 1.5 to 16 hours post infection as specified.  
581 All HIV-1 viruses are generated by transient transfection of provirus plasmids in 293T in 10cm  
582 dish at 50% confluency and harvesting 48 hours post transfection, followed by DNase-treatment  
583 and concentrated through a 25% sucrose TNE by centrifugation for 16 hours at 3000 x g at 4°C.

584 VSV-G-pseudotyped HIV-1 firefly luciferase (luc) was prepared by transfecting 10 µg of NL4-3 R+  
585 E- firefly-luc plasmid, provided by Dr. Nathaniel Landau and 1.5 µg of pCMV-VSV-G with 40 µl of  
586 PEI (pH 4.5, 1 µg/ml) or 30 µl of lipofectamine 2000. HIV-Gag-IN-mRuby3 virus were produced  
587 by transfecting 5 µg of pNL43 env-, 2 µg of Gag-IN-mRuby3 and 4 µg of pCMV-VSV-G. HIV-  
588 iGFP and Gag-IN-mRuby3 viruses were produced by transfection of 5 µg of HIV-Gag-iGFP, 3 µg  
589 of pGag-IN-mRuby3, and 4 µg of pCMV-VSV-G (Mamede et al., 2017; Sultana et al., 2019).  
590 CypA-dsRed packaged HIV-1 virus were produced by transfection of 5 µg of NL43dEnv-, 3 µg of  
591 pCMV-VSV-G and 4 µg of CypA-dsRed plasmids (Francis et al., 2016; Francis and Melikyan,  
592 2018).

593 The Mount Sinai Department of Microbiology Virus Collection provided the Cantell strain  
594 of Sendai virus, and it was grown for 2 days in 10-day old embryonated chicken eggs, and it was  
595 tittered using turkey RBC HA assays (Lampire Biological Laboratories).

#### 596 **CRISPR-Cas9 RNP Production and THP-1 Electroporation**

597 Detailed protocols for RNP production have been previously published (Hultquist et al., 2019). All  
598 crRNA guide sequences used in this study were derived from the Dharmacon pre-designed Edit-  
599 R library for gene knock-out, including the non-targeting guide (U-007502), cGAS-targeting guides  
600 (equimolar pool of CM-015607-01 through CM-015607-05), and NONO-targeting guides (CM-  
601 007756-02 and CM-007756-05).

#### 602 **Guide RNA Sequences**

| <u>Gene</u>   | <u>Guide Number</u> | <u>Sequence</u>       | <u>Catalog Number</u> |
|---------------|---------------------|-----------------------|-----------------------|
| MB21D1 (cGAS) | 1                   | TTGAATGCGCAGGCCTTCTT  | CM-015607-01          |
| MB21D1 (cGAS) | 2                   | CTGGGTACATACGTGAAAGA  | CM-015607-02          |
| MB21D1 (cGAS) | 3                   | GAAC TTTCCCGCCTTAGGCA | CM-015607-03          |
| MB21D1 (cGAS) | 4                   | CCGCGATGATATCTCCACGG  | CM-015607-04          |
| MB21D1 (cGAS) | 5                   | GCATCCCTCCGTACGAGAAT  | CM-015607-05          |
| NONO (4841)   | 2                   | GTTTATGCCCATAGCACCTA  | CM-007756-02          |
| NONO (4841)   | 5                   | ATGGGAGATATACCGCATCA  | CM-007756-05          |

603  
604



605 **Immunofluorescence, image acquisition and analysis.**

606 PMA-THP-1 cells were seeded at a density of  $2.5 \times 10^4$  cells/ well in a 96 well glass plate for 48  
607 hours followed by infection with HIV-1 virus with or without VLP-Vpx as specified or transfection  
608 of either HT DNA or cGAMP for 1.5 hrs to 3 hrs. The cells were then fixed with 4% w/v  
609 paraformaldehyde in PBS and permeabilized using a standard protocol and subjected to  
610 immunostaining. Cells were imaged via fluorescence wide-field deconvolution or confocal  
611 microscopy. DV-Elite, GE-Ultra, OMX-SR, Nikon Tle-2, Zeiss LSMv880 were utilized. Images  
612 obtained in GE microscopes were deconvolved in SoftWorx package with the standard vendor  
613 software definitions and camera biases. Images obtained in Nikon Tle-2 microscope were  
614 deconvolved using FlowDec using Lucy-Richardson algorithm with the support of pims using  
615 python 3.x with PSFs generated in FIJI/ImageJ. Super resolution Images were obtained in 3D-  
616 SIM mode in a GE OMX-SR microscope equipped with 4 laser lines, 60x/1.42 NA oil immersion  
617 lens (Olympus), and 3 independent cameras. Images were calculated/reconstructed and channel  
618 registered via the vendor's software (SoftWorx) with 0.001 Wiener constant values.

619 **Fluorescence resonance energy transfer assay**

620 Viral infections with dsRed-CypA labeled particles were imaged in cells expressing eYFP or  
621 PQBP1-eYFP truncations. Images were acquired as a Z-stack with a GE-Deltavision Ultra  
622 microscope equipped with a PCO edge CMOS camera and an oil immersion 60x/1.42 NA  
623 Olympus lens with 1.42 NA and deconvolved using the vendors software (SoftWorkx). Excitation  
624 was done with an SSI-LED light source, and the emitted wavelength collection was cleaned up  
625 with the different excitation/emission filters; for FRET (YFP/mCherry); YFP (YFP/YFP); dsRed  
626 (mCherry/mCherry). Analysis was performed by identifying the coordinates of viral particles in the  
627 deconvolved images and measuring the intensities from the raw images on each corresponding  
628 channels in the regions containing viral particles. Cross-talk was controlled by measuring  
629 intensities of dsRed-CypA labeled particles in cells in the absence and the presence of eYFP or  
630 PQBP1-eYFPs constructs. The cross-talk control also included the measurement of signals from

631 the cells without viral particles. The values for the normalized FRET of viral particle Intensities  
632 were calculated using following formula and methods as in (Jiang and Sorkin, 2002; Sood et al.,  
633 2017; Zal and Gascoigne, 2004):

$$634 \text{ Normalized FRET} = \frac{(I_{\text{YFP/mCh}} - \text{YFPem crosstalk}) * (I_{\text{YFP/YFP}} - \text{mCh excitation crosstalk}) * I_{\text{mCh/mCh}}}{I_{\text{mCh/mCh}}}$$

635

## 636 **Viral capsid integrity assay - Correlative Live and fixed immunofluorescent Imaging**

### 637 **Analysis**

638 Delta Vision wide-field microscopes (DV-ELITE or OMX-SR, GE Life Sciences) equipped with an  
639 electron multiplying charge-coupled device (EMCCD) camera and CMOS cameras (PCO edge),  
640 solid state illumination (SSI-LED) light path was used to acquire time-lapsed fluorescent  
641 snapshots HIV-iGFP/IN-mRuby3 viruses infecting THP-1 or MDDCs plated in Delta T culture  
642 dishes (Bioprotechs) or  $\mu$ -Slide I Luer (Ibidi) that were coated with fibronectin (SIGMA) for overnight  
643 adhesion of MDDCs (but not THP-1) according to the supplier's instructions. Cells were kept in a  
644 37°C heated chamber, together with a blood gas mixture (5% CO<sub>2</sub>, 20% oxygen), throughout the  
645 imaging process. Cells were incubated with RPMI without phenol red with 10% FBS, L-glutamine,  
646 and MEM-NEAA. All infections were done with Polybrene at a concentration of 5  $\mu$ g/ml. Z-stacking  
647 spacing was set to 0.5  $\mu$ m, with a total of 12- $\mu$ m z-axis imaging for the fluorescence snapshots,  
648 and a single Z reference image was taken in bright field for cell edge identification. Nominal  
649 magnification was 60x/1.42NA lens for all experiments. Cells were washed once with PBS,  
650 promptly after the last time point of imaging, and fixed with final 3.7% formaldehyde in piperazine-  
651 N,N'-bis (PIPES) buffer for 5 min, followed by three PBS washes, as in (Mamede et al., 2017).  
652 Culture dishes were then permeabilized with blocking media made of TX-10 donkey serum and  
653 stained with antibodies probing for PQBP1 (Sigma) and cGAS (Novus) followed by anti-mouse-  
654 AF647 and anti-Rb-dylight405 (Jackson ImmunoResearch) secondary antibodies, respectively.  
655 Using the same microscope, or synchronized trays between DV-ELITE and OMX-SR, the

656 previously time-lapse imaged cells and fields of view were found and imaged after staining. The  
657 viral particles were identified by their IN-mRuby3 signal present in the same area as the last time-  
658 lapse time-frame, when still present in this second phase. ROIs were set in ImageJ/Fiji based on  
659 the IN-mRuby3 puncta and the mean intensities for all channels in such ROI were quantified and  
660 plotted. The second verification of capsid integrity loss was performed in the fixed imaging stage  
661 by the disappearance of iGFP signal.

662 Z-stacks were deconvolved and z-projected using SoftWorx (GE Life Sciences) before  
663 each individual IN-mRuby3 particle were tracked over time was performed using FIJI/ImageJ  
664 (NIH). Mean intensities of HIV-iGFP were automatically measured in the same x-y coordinates  
665 where the IN particle was identified by the tracking algorithm. Centered particle video recordings  
666 were automatically generated by an in-house-made Python scripts using pims ([http://soft-](http://soft-matter.github.io/pims/)  
667 [matter.github.io/pims/](http://soft-matter.github.io/pims/)) and Matplotlib libraries, with the data analyzed and exported from  
668 Fiji/ImageJ as in (Mamede et al., 2017; Sultana et al., 2019).

669 **Proximal Ligation Assay (PLA).** PMA-THP-1 cells, 3 hours post-infection, were fixed in 4% PFA  
670 in PBS for 20 min, permeabilized with 0.2% Triton X-100 in PBS, and subjected to PLA assay  
671 according to manufactural protocol of Duolink in situ detection reagents red kit (DUO92008,  
672 Sigma-Aldrich). Antibody incubations were used at 1;400 dilution: anti-rabbit HIV1 p24 (Abcam-  
673 ab32352) and mouse anti-FLAG® M2 antibody (Sigma). PLA dots were detected using Nikon  
674 A1R HD confocal with 60X objective. Analysis was done using ImageJ.

675

676 **Image Analysis.** Identification of viral particles from infected THP-1 cells was done with python  
677 with skimage, scipy, pims, and trackpy tools (v0.4.2 - <http://soft-matter.github.io/trackpy/>). In short,  
678 cells were subjected to a binary threshold so that no extracellular signals (viruses or cell debris)  
679 would confound the analysis. Viral particles were detected using thresholding and watershed

680 segmentation methods or by using trackpy. For the virus analysis, the masks of the pixels that  
681 are positive for viral particles were then quantified for each independent channel (PQBP1, cGAS,  
682 iGFP, IN label, etc)

### 683 **Co-immunoprecipitation.**

684 MDDCs or PMA-THP-1 cells expressing Flag-cGAS proteins were infected with VSV-G pseudo-  
685 typed HIV-1 luciferase virus at MOI of 1 in the absence and presence of VLP-Vpx co-infection  
686 respectively. Three hours post infection, cells were lysed and subjected to immunoprecipitation  
687 against endogenous PQBP1 proteins, followed probing the IPs for endogenous cGAS or Flag-  
688 cGAS presence. HEK293T lysates expressing eYFP or eYFP fused either to wild type or mutant  
689 PQBP1 and MBP-cGAS were subjected to immunoprecipitation against MBP tags, followed by  
690 probing for the presence of PQBP1-YFP proteins. Typically, 300 µg of protein lysates were  
691 incubated with anti-MBP-magnetic beads (NEB) in 100 mM KCl, 12.5mM MgCl<sub>2</sub>, 0.5% Triton-X,  
692 20 mM HEPES, 0.2 mM EDTA, 10% glycerol, 0.2 µM PMSF, and protease inhibitors. The beads  
693 were washed three times with a washing buffer (20 mM HEPES, 0.2 mM EDTA, 300 mM KCl,  
694 0.5% Triton-X, 10% glycerol and 0.2 µM PMSF) followed by a conventional western blot analysis.

### 695 **Recombinant protein production:**

696 C-terminal MBP-6xHis tag is fused to CA (A14C/E45C) using a SARS main protease cleavage  
697 site linker in pET11a as previous described (Summers et al., 2019). 6xHis-PQBP1 was cloned  
698 into pCDFDuet using BamHI/HindIII restriction sites. MBP, used as a negative control in co-  
699 pelleting, was obtained from cleaved CA(A14C/E45C) during purification before assembling into  
700 tubes. Protein was over expressed in BL21(DE3) cells grown to OD of 0.6-0.8 and induced with  
701 0.5 mM IPTG at 25 °C for CA(A14C/E45C)-MBP-6xHis or 18°C for 6xHis-PQBP1 for 18  
702 hours. Cells were lysed via microfluidization in 50 mM Tris, pH 8.0, 500 mM NaCl, 5% v/v glycerol,  
703 0.1 mM TCEP with a protease inhibitor tablet (Roche). CA(A14C/E45C)-MBP-6xHis was purified  
704 as described previously (Summers et al., 2019). 6xHis-PQBP1 clarified lysate was purified via Ni-  
705 NTA (Qiagen) affinity and size exclusion chromatography (GE). 6xHis-PQBP1 was concentrated

706 to 5-10 mg/mL in 50 mM Tris, pH 8.0, 50 mM NaCl, 0.1 mM TCEP and flash frozen in liquid  
707 nitrogen until use. CA tubes were assembled as described previously (Pornillos et al., 2009) from  
708 the purified, MBP-6xHis cleaved CA(A14C/E45C) and stored at 4°C in 50 mM Tris, pH 8.0 until  
709 use.

710 Co-pelleting assays were performed by incubating a final concentration of 10 µM PQBP1  
711 or MBP with 100 µM assembled CA tubes in the presence of 25 or 500 mM NaCl on ice. Reaction  
712 buffer contained the noted amount of NaCl with 50 mM Tris, pH 8.0, 25 mM NaCl, 0.1% v/v NP-  
713 40. Samples were centrifuged 20 min at 4°C and 14,500 g and supernatant was separated from  
714 the pellet. The pellet was dissolved in an equal volume of buffer and samples were analyzed via  
715 SDS-PAGE on NuPage™ gel (Invitrogen) and developed with SimplyBlue™ stain (Invitrogen).  
716 Gel was imaged directly with a CCD camera.

#### 717 **Covalent labelling of Recombinant PQBP1, CypA, and CPSF6<sub>313-327</sub>**

718 Recombinant PQBP1 proteins in PBS (1X) and 0.1 mM TCEP was incubated with AlexaFluor488-  
719 C5-malamide dye (Thermo Fischer Scientific) in a 1:1.2 molar ratio for 15 min at room temperature.  
720 Unreacted dye was removed by size exclusion chromatography using a Superdex 200 Increase  
721 5/150 GL column (Cytiva) equilibrated in 20 mM Tris-HCl (pH 8.0) and 100 mM NaCl flowing at  
722 0.2 mL/min on a HPLC (Shimadzu). Fractions were collected manually and fractions containing  
723 labelled AF488-PQBP1 conjugate were identified by SDS PAGE and imaging with the Alexa Fluor  
724 488 filter on the ChemiDoc MP imaging system (BIORAD). Proteins were stored at -80°C in 10%  
725 v/v glycerol and dialyzed into 20 mM Tris-HCl (pH 8.0) and 75 mM NaCl prior to TCCD  
726 measurements. Purification and labelling of CypA and CPSF6<sub>313-327</sub> peptide with Alexa Fluor dyes  
727 were previously described (Lau et al., 2019; Peng et al., 2019).

#### 728 **Cell-Free Expression and Purification of GFP-tagged PQBP1 fragments**

729 The coding sequences for PQBP1<sub>1-46</sub> and PQBP1<sub>47-265</sub> were amplified by PCR and cloned into  
730 Gateway™ vectors and contain either an N-terminal 8xHis-eGFP or C-terminal sfGFP-8xHis tags  
731 using Gibson assembly (NEB). For each construct, purified plasmid DNA was added to 100 µL

732 *Leishmania tarentolae* cell-free expression mix to 60 nM DNA and expressed for 2.5 hrs at 28  
733 °C.(Lau et al., 2019) The expressed PQBP1 fragments were bound to Ni-NTA beads (BIORAD)  
734 for 30 min on ice and washed with 300 µL of 20 mM Tris-HCl (pH 8.0) and 100 mM NaCl before  
735 eluting bound protein with 40 µL of the same buffer containing 0.5 M imidazole. Purified PQBP1  
736 constructs were then dialyzed into 20 mM Tris-HCl (pH 8.0) and 75 mM NaCl for 1 hr and were  
737 immediately used for TCCD measurements.

#### 738 **In vitro CA lattice assembly**

739 Recombinant HIV-1 CA with and without the additional mutations (R18G, N74D) and CA K158C-  
740 AF568 were purified and labeled as described previously (Lau et al., 2019). CA lattices were  
741 assembled *in vitro* at 80 µM CA (1:99 ratio of CAK158C-AF568:CAA204C) in Tris-HCl (pH 8.0)  
742 and 1 M NaCl. The assembly solution was incubated 37°C for 15 min followed by 4°C overnight.  
743 Assembled CA lattices were dialyzed into 20 mM Tris-HCl (pH 8.0) and containing 75 mM NaCl.

#### 744 **Two-color coincidence detection (TCCD) spectroscopy**

745 The TCCD fluorescence fluctuation spectroscopy approach has been described previously (Lau  
746 et al., 2021). Binding reactions were performed in 20 mM Tris-HCl (pH 8.0) and 75 mM NaCl  
747 containing 8 µM of CA (monomeric equivalent) that were assembled under high salt with binders  
748 as follows: 100 nM GFP-tagged PQBP1, 20 nM PQBP1-AF488, 50 nM CypA-AF488, 10 nM  
749 CPSF6<sub>313-327</sub>-AF488, and 10 nM of fluorescein-12-dATP (PerkinElmer, NEL465001EA). Where  
750 applicable hexacarboxybenzene (HCB) was added to a final concentration of 10 µM. At least  
751 100 s of data were collected for each condition in 10 s acquisitions at 1000 Hz binning on an  
752 inverted microscope equipped with 488 nm (2.6 mW), 561 nm (0.5 mW) lasers and a water  
753 immersion 40x/1.2 NA objective (Zeiss). The emitted fluorescence from each fluorophore was  
754 separated into two channels using a dichroic mirror (565 nm) and filtered through a 525/50 nm  
755 band pass filter (AF488/GFP signal) and 590 nm long pass filter (AF568 signal), respectively,  
756 prior to focusing onto separate single photon avalanche diodes (Micro Photon Devices). The  
757 coincidence intensity ratios were calculated using a custom in-house software (TRISTAN,

758 [https://github.com/lilbutsa/Tristan/tree/master/v0\\_2/Matlab\\_Programs](https://github.com/lilbutsa/Tristan/tree/master/v0_2/Matlab_Programs)) as the slope of a curve  
759 obtained using weighted linear correlation of a graph plotting the binder fluorescence intensity  
760 plotting against its corresponding capsid signal intensities from each 10 s acquisition.(Lau et al.,  
761 2021) Coincidence ratios in different conditions were compared using ordinary one-way ANOVA  
762 using GraphPad Prism (v8.4).

763

764 **Video S1.**

765 **Time-lapse imaging to monitor structural integrity of an incoming viral particle with iGFP**  
766 **fluid phase marker (iGFP+IN-mRuby3) in MDDCs. See Figure S3B for detail.**

767

768

769

## REFERENCES

- 770 Ablasser, A., and Chen, Z.J. (2019). cGAS in action: Expanding roles in immunity and  
771 inflammation. *Science* 363.
- 772 Bhattacharya, A., Alam, S.L., Fricke, T., Zadrozny, K., Sedzicki, J., Taylor, A.B., Demeler, B.,  
773 Pornillos, O., Ganser-Pornillos, B.K., Diaz-Griffero, F., *et al.* (2014). Structural basis of HIV-1  
774 capsid recognition by PF74 and CPSF6. *Proc Natl Acad Sci U S A* 111, 18625-18630.
- 775 Burdick, R.C., Li, C., Munshi, M., Rawson, J.M.O., Nagashima, K., Hu, W.S., and Pathak, V.K.  
776 (2020). HIV-1 uncoats in the nucleus near sites of integration. *Proc Natl Acad Sci U S A* 117,  
777 5486-5493.
- 778 Campbell, E.M., and Hope, T.J. (2015). HIV-1 capsid: the multifaceted key player in HIV-1  
779 infection. *Nat Rev Microbiol* 13, 471-483.
- 780 Chen, P., Hubner, W., Spinelli, M.A., and Chen, B.K. (2007). Predominant mode of human  
781 immunodeficiency virus transfer between T cells is mediated by sustained Env-dependent  
782 neutralization-resistant virological synapses. *J Virol* 81, 12582-12595.
- 783 Chin, A.C. (2019). Neuroinflammation and the cGAS-STING pathway. *J Neurophysiol* 121, 1087-  
784 1091.
- 785 Christensen, D.E., Ganser-Pornillos, B.K., Johnson, J.S., Pornillos, O., and Sundquist, W.I. (2020).  
786 Reconstitution and visualization of HIV-1 capsid-dependent replication and integration in vitro.  
787 *Science* 370.
- 788 Collins, A.C., Cai, H., Li, T., Franco, L.H., Li, X.D., Nair, V.R., Scharn, C.R., Stamm, C.E., Levine,  
789 B., Chen, Z.J., *et al.* (2015). Cyclic GMP-AMP Synthase Is an Innate Immune DNA Sensor for  
790 *Mycobacterium tuberculosis*. *Cell Host Microbe* 17, 820-828.
- 791 Cosnefroy, O., Murray, P.J., and Bishop, K.N. (2016). HIV-1 capsid uncoating initiates after the  
792 first strand transfer of reverse transcription. *Retrovirology* 13, 58.
- 793 Dharan, A., Opp, S., Abdel-Rahim, O., Keceli, S.K., Imam, S., Diaz-Griffero, F., and Campbell,  
794 E.M. (2017). Bicaudal D2 facilitates the cytoplasmic trafficking and nuclear import of HIV-1  
795 genomes during infection. *Proc Natl Acad Sci U S A* 114, E10707-E10716.

796 Doitsh, G., Cavrois, M., Lassen, K.G., Zepeda, O., Yang, Z., Santiago, M.L., Hebbeler, A.M., and  
797 Greene, W.C. (2010). Abortive HIV infection mediates CD4 T cell depletion and inflammation in  
798 human lymphoid tissue. *Cell* *143*, 789-801.

799 Felts, A.K., Labarge, K., Bauman, J.D., Patel, D.V., Himmel, D.M., Arnold, E., Parniak, M.A.,  
800 and Levy, R.M. (2011). Identification of alternative binding sites for inhibitors of HIV-1  
801 ribonuclease H through comparative analysis of virtual enrichment studies. *J Chem Inf Model* *51*,  
802 1986-1998.

803 Francis, A.C., Marin, M., Shi, J., Aiken, C., and Melikyan, G.B. (2016). Time-Resolved Imaging  
804 of Single HIV-1 Uncoating In Vitro and in Living Cells. *PLoS Pathog* *12*, e1005709.

805 Francis, A.C., and Melikyan, G.B. (2018). Single HIV-1 Imaging Reveals Progression of Infection  
806 through CA-Dependent Steps of Docking at the Nuclear Pore, Uncoating, and Nuclear Transport.  
807 *Cell Host Microbe* *23*, 536-548 e536.

808 Gamble, T.R., Vajdos, F.F., Yoo, S., Worthylake, D.K., Houseweart, M., Sundquist, W.I., and Hill,  
809 C.P. (1996). Crystal structure of human cyclophilin A bound to the amino-terminal domain of  
810 HIV-1 capsid. *Cell* *87*, 1285-1294.

811 Gao, D., Wu, J., Wu, Y.T., Du, F., Aroh, C., Yan, N., Sun, L., and Chen, Z.J. (2013). Cyclic GMP-  
812 AMP synthase is an innate immune sensor of HIV and other retroviruses. *Science* *341*, 903-906.

813 Hall, J., Brault, A., Vincent, F., Weng, S., Wang, H., Dumlao, D., Aulabaugh, A., Aivazian, D.,  
814 Castro, D., Chen, M., *et al.* (2017). Discovery of PF-06928215 as a high affinity inhibitor of cGAS  
815 enabled by a novel fluorescence polarization assay. *PLoS One* *12*, e0184843.

816 Hu, W.S., and Hughes, S.H. (2012). HIV-1 reverse transcription. *Cold Spring Harb Perspect Med*  
817 *2*.

818 Hubner, W., Chen, P., Del Portillo, A., Liu, Y., Gordon, R.E., and Chen, B.K. (2007). Sequence  
819 of human immunodeficiency virus type 1 (HIV-1) Gag localization and oligomerization monitored  
820 with live confocal imaging of a replication-competent, fluorescently tagged HIV-1. *J Virol* *81*,  
821 12596-12607.

822 Hubner, W., McNeerney, G.P., Chen, P., Dale, B.M., Gordon, R.E., Chuang, F.Y., Li, X.D., Asmuth,  
823 D.M., Huser, T., and Chen, B.K. (2009). Quantitative 3D video microscopy of HIV transfer across  
824 T cell virological synapses. *Science* *323*, 1743-1747.

825 Hulme, A.E., Kelley, Z., Okocha, E.A., and Hope, T.J. (2015). Identification of capsid mutations  
826 that alter the rate of HIV-1 uncoating in infected cells. *J Virol* *89*, 643-651.

827 Hulme, A.E., Perez, O., and Hope, T.J. (2011). Complementary assays reveal a relationship  
828 between HIV-1 uncoating and reverse transcription. *Proc Natl Acad Sci U S A* *108*, 9975-9980.

829 Hultquist, J.F., Hiatt, J., Schumann, K., McGregor, M.J., Roth, T.L., Haas, P., Doudna, J.A.,  
830 Marson, A., and Krogan, N.J. (2019). CRISPR-Cas9 genome engineering of primary CD4(+) T  
831 cells for the interrogation of HIV-host factor interactions. *Nat Protoc* *14*, 1-27.

832 Iliina, T., Labarge, K., Sarafianos, S.G., Ishima, R., and Parniak, M.A. (2012). Inhibitors of HIV-  
833 1 Reverse Transcriptase-Associated Ribonuclease H Activity. *Biology (Basel)* *1*, 521-541.

834 Iwasaki, Y., and Thomsen, G.H. (2014). The splicing factor PQBP1 regulates mesodermal and  
835 neural development through FGF signaling. *Development* *141*, 3740-3751.

836 Jacques, D.A., McEwan, W.A., Hilditch, L., Price, A.J., Towers, G.J., and James, L.C. (2016).  
837 HIV-1 uses dynamic capsid pores to import nucleotides and fuel encapsidated DNA synthesis.  
838 *Nature* *536*, 349-353.

839 James, L.C., and Jacques, D.A. (2018). The Human Immunodeficiency Virus Capsid Is More Than  
840 Just a Genome Package. *Annu Rev Virol* *5*, 209-225.



841 Jiang, X., and Sorkin, A. (2002). Coordinated traffic of Grb2 and Ras during epidermal growth  
842 factor receptor endocytosis visualized in living cells. *Mol Biol Cell* *13*, 1522-1535.

843 Julias, J.G., McWilliams, M.J., Sarafianos, S.G., Arnold, E., and Hughes, S.H. (2002). Mutations  
844 in the RNase H domain of HIV-1 reverse transcriptase affect the initiation of DNA synthesis and  
845 the specificity of RNase H cleavage in vivo. *Proc Natl Acad Sci U S A* *99*, 9515-9520.

846 Lahaye, X., Gentili, M., Silvin, A., Conrad, C., Picard, L., Jouve, M., Zueva, E., Maurin, M.,  
847 Nadalin, F., Knott, G.J., *et al.* (2018). NONO Detects the Nuclear HIV Capsid to Promote cGAS-  
848 Mediated Innate Immune Activation. *Cell* *175*, 488-501 e422.

849 Lau, D., Walsh, J.C., Dickson, C.F., Tuckwell, A., Stear, J.H., Hunter, D.J.B., Bhumkar, A., Shah,  
850 V., Turville, S.G., Sierecki, E., *et al.* (2021). Rapid HIV-1 Capsid Interaction Screening Using  
851 Fluorescence Fluctuation Spectroscopy. *Anal Chem*.

852 Lau, D., Walsh, J.C., Peng, W., Shah, V.B., Turville, S., Jacques, D.A., and Bocking, T. (2019).  
853 Fluorescence Biosensor for Real-Time Interaction Dynamics of Host Proteins with HIV-1 Capsid  
854 Tubes. *ACS Appl Mater Interfaces* *11*, 34586-34594.

855 Mallery, D.L., Faysal, K.M.R., Kleinpeter, A., Wilson, M.S.C., Vaysburd, M., Fletcher, A.J.,  
856 Novikova, M., Bocking, T., Freed, E.O., Saiardi, A., *et al.* (2019). Cellular IP6 Levels Limit HIV  
857 Production while Viruses that Cannot Efficiently Package IP6 Are Attenuated for Infection and  
858 Replication. *Cell Rep* *29*, 3983-3996 e3984.

859 Mallery, D.L., Marquez, C.L., McEwan, W.A., Dickson, C.F., Jacques, D.A.,  
860 Anandapadamanaban, M., Bichel, K., Towers, G.J., Saiardi, A., Bocking, T., *et al.* (2018). IP6 is  
861 an HIV pocket factor that prevents capsid collapse and promotes DNA synthesis. *Elife* *7*.

862 Mamede, J.I., Cianci, G.C., Anderson, M.R., and Hope, T.J. (2017). Early cytoplasmic uncoating  
863 is associated with infectivity of HIV-1. *Proc Natl Acad Sci U S A* *114*, E7169-E7178.

864 Manel, N., Hogstad, B., Wang, Y., Levy, D.E., Unutmaz, D., and Littman, D.R. (2010). A cryptic  
865 sensor for HIV-1 activates antiviral innate immunity in dendritic cells. *Nature* *467*, 214-217.

866 Mattei, S., Glass, B., Hagen, W.J., Krausslich, H.G., and Briggs, J.A. (2016). The structure and  
867 flexibility of conical HIV-1 capsids determined within intact virions. *Science* *354*, 1434-1437.

868 Novikova, M., Zhang, Y., Freed, E.O., and Peng, K. (2019). Multiple Roles of HIV-1 Capsid  
869 during the Virus Replication Cycle. *Virology* *541*, 119-134.

870 Paludan, S.R., and Bowie, A.G. (2013). Immune sensing of DNA. *Immunity* *38*, 870-880.

871 Peng, W., Shi, J., Marquez, C.L., Lau, D., Walsh, J., Faysal, K.M.R., Byeon, C.H., Byeon, I.L.,  
872 Aiken, C., and Bocking, T. (2019). Functional analysis of the secondary HIV-1 capsid binding site  
873 in the host protein cyclophilin A. *Retrovirology* *16*, 10.

874 Perilla, J.R., and Gronenborn, A.M. (2016). Molecular Architecture of the Retroviral Capsid.  
875 *Trends Biochem Sci* *41*, 410-420.

876 Pornillos, O., Ganser-Pornillos, B.K., Kelly, B.N., Hua, Y., Whitby, F.G., Stout, C.D., Sundquist,  
877 W.I., Hill, C.P., and Yeager, M. (2009). X-ray structures of the hexameric building block of the  
878 HIV capsid. *Cell* *137*, 1282-1292.

879 Pornillos, O., Ganser-Pornillos, B.K., and Yeager, M. (2011). Atomic-level modelling of the HIV  
880 capsid. *Nature* *469*, 424-427.

881 Price, A.J., Jacques, D.A., McEwan, W.A., Fletcher, A.J., Essig, S., Chin, J.W., Halambage, U.D.,  
882 Aiken, C., and James, L.C. (2014). Host cofactors and pharmacologic ligands share an essential  
883 interface in HIV-1 capsid that is lost upon disassembly. *PLoS Pathog* *10*, e1004459.

884 Rankovic, S., Ramalho, R., Aiken, C., and Rousso, I. (2018). PF74 Reinforces the HIV-1 Capsid  
885 To Impair Reverse Transcription-Induced Uncoating. *J Virol* *92*.

886 Rankovic, S., Varadarajan, J., Ramalho, R., Aiken, C., and Rousso, I. (2017). Reverse  
887 Transcription Mechanically Initiates HIV-1 Capsid Disassembly. *J Virol* *91*.  
888 Reinert, L.S., Lopusna, K., Winther, H., Sun, C., Thomsen, M.K., Nandakumar, R., Mogensen,  
889 T.H., Meyer, M., Vaegter, C., Nyengaard, J.R., *et al.* (2016). Sensing of HSV-1 by the cGAS-  
890 STING pathway in microglia orchestrates antiviral defence in the CNS. *Nat Commun* *7*, 13348.  
891 Smaga, S.S., Xu, C., Summers, B.J., Digianantonio, K.M., Perilla, J.R., and Xiong, Y. (2019).  
892 MxB Restricts HIV-1 by Targeting the Tri-hexamer Interface of the Viral Capsid. *Structure* *27*,  
893 1234-1245 e1235.  
894 Soliman, M., Srikrishna, G., and Balagopal, A. (2017). Mechanisms of HIV-1 Control. *Curr*  
895 *HIV/AIDS Rep* *14*, 101-109.  
896 Sood, C., Francis, A.C., Desai, T.M., and Melikyan, G.B. (2017). An improved labeling strategy  
897 enables automated detection of single-virus fusion and assessment of HIV-1 protease activity in  
898 single virions. *J Biol Chem* *292*, 20196-20207.  
899 Sultana, T., Mamede, J.I., Saito, A., Ode, H., Nohata, K., Cohen, R., Nakayama, E.E., Iwatani, Y.,  
900 Yamashita, M., Hope, T.J., *et al.* (2019). Multiple Pathways To Avoid Beta Interferon Sensitivity  
901 of HIV-1 by Mutations in Capsid. *J Virol* *93*.  
902 Summers, B.J., Digianantonio, K.M., Smaga, S.S., Huang, P.T., Zhou, K., Gerber, E.E., Wang,  
903 W., and Xiong, Y. (2019). Modular HIV-1 Capsid Assemblies Reveal Diverse Host-Capsid  
904 Recognition Mechanisms. *Cell Host Microbe* *26*, 203-216 e206.  
905 Sumner, R.P., Harrison, L., Touizer, E., Peacock, T.P., Spencer, M., Zuliani-Alvarez, L., and  
906 Towers, G.J. (2020). Disrupting HIV-1 capsid formation causes cGAS sensing of viral DNA.  
907 *EMBO J* *39*, e103958.  
908 Sun, L., Wu, J., Du, F., Chen, X., and Chen, Z.J. (2013). Cyclic GMP-AMP synthase is a cytosolic  
909 DNA sensor that activates the type I interferon pathway. *Science* *339*, 786-791.  
910 Tamura, T., Sone, M., Nakamura, Y., Shimamura, T., Imoto, S., Miyano, S., and Okazawa, H.  
911 (2013). A restricted level of PQBP1 is needed for the best longevity of *Drosophila*. *Neurobiol*  
912 *Aging* *34*, 356 e311-320.  
913 Wang, L., Casey, M.C., Vernekar, S.K.V., Sahani, R.L., Kirby, K.A., Du, H., Zhang, H., Tedbury,  
914 P.R., Xie, J., Sarafianos, S.G., *et al.* (2021). Novel PF74-like small molecules targeting the HIV-  
915 1 capsid protein: Balance of potency and metabolic stability. *Acta Pharm Sin B* *11*, 810-822.  
916 Wiser, C., Kim, B., Vincent, J., and Ascano, M. (2020). Small molecule inhibition of human cGAS  
917 reduces total cGAMP output and cytokine expression in cells. *Sci Rep* *10*, 7604.  
918 Yoh, S.M., Schneider, M., Seifried, J., Soonthornvacharin, S., Akleh, R.E., Olivieri, K.C., De Jesus,  
919 P.D., Ruan, C., de Castro, E., Ruiz, P.A., *et al.* (2015). PQBP1 Is a Proximal Sensor of the cGAS-  
920 Dependent Innate Response to HIV-1. *Cell* *161*, 1293-1305.  
921 Zal, T., and Gascoigne, N.R. (2004). Photobleaching-corrected FRET efficiency imaging of live  
922 cells. *Biophys J* *86*, 3923-3939.  
923  
924

A.

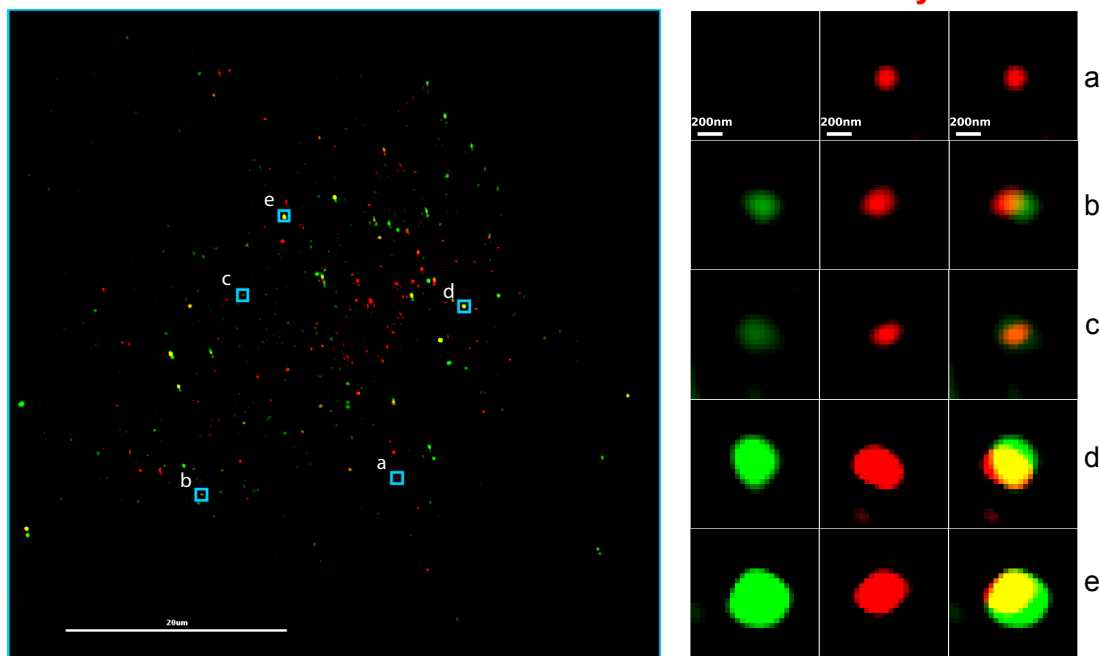

B.

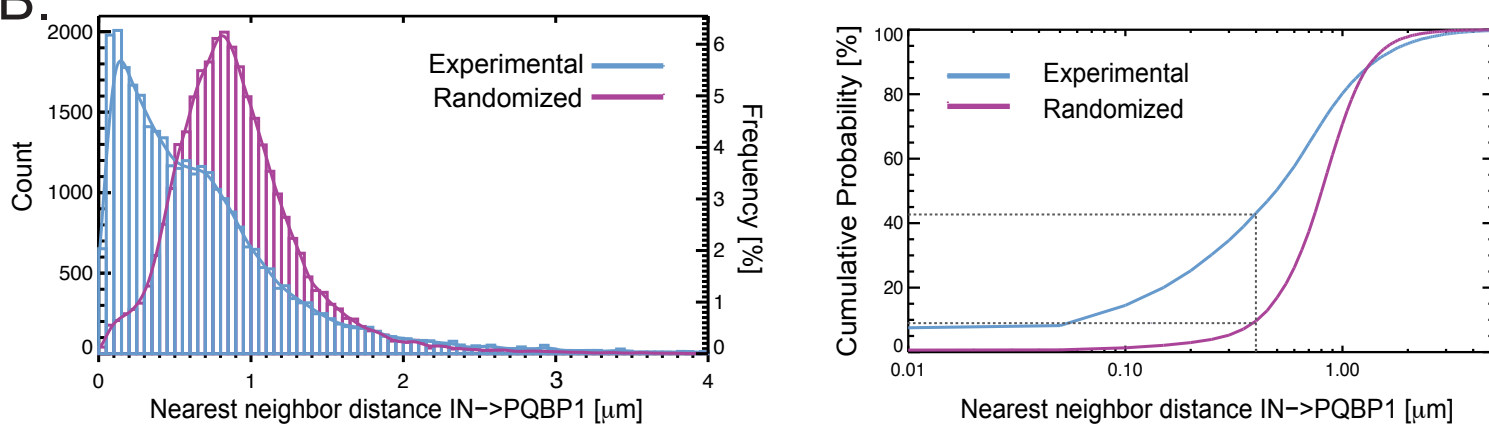

C.

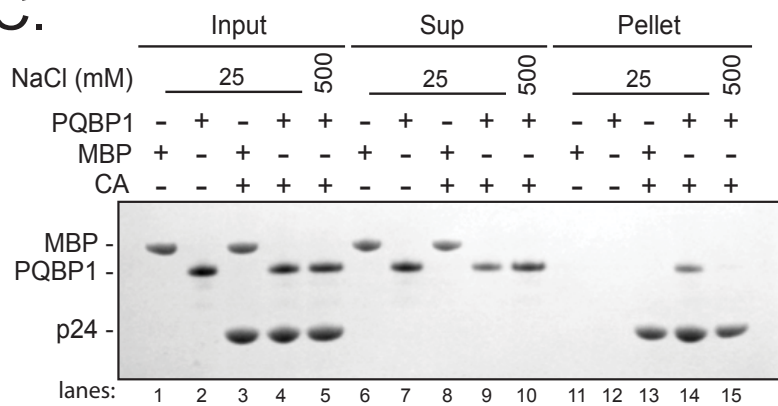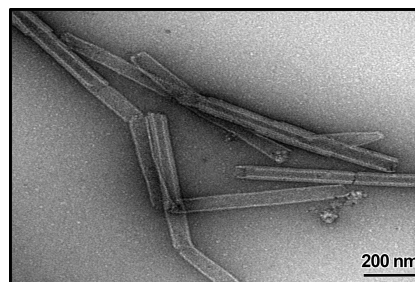

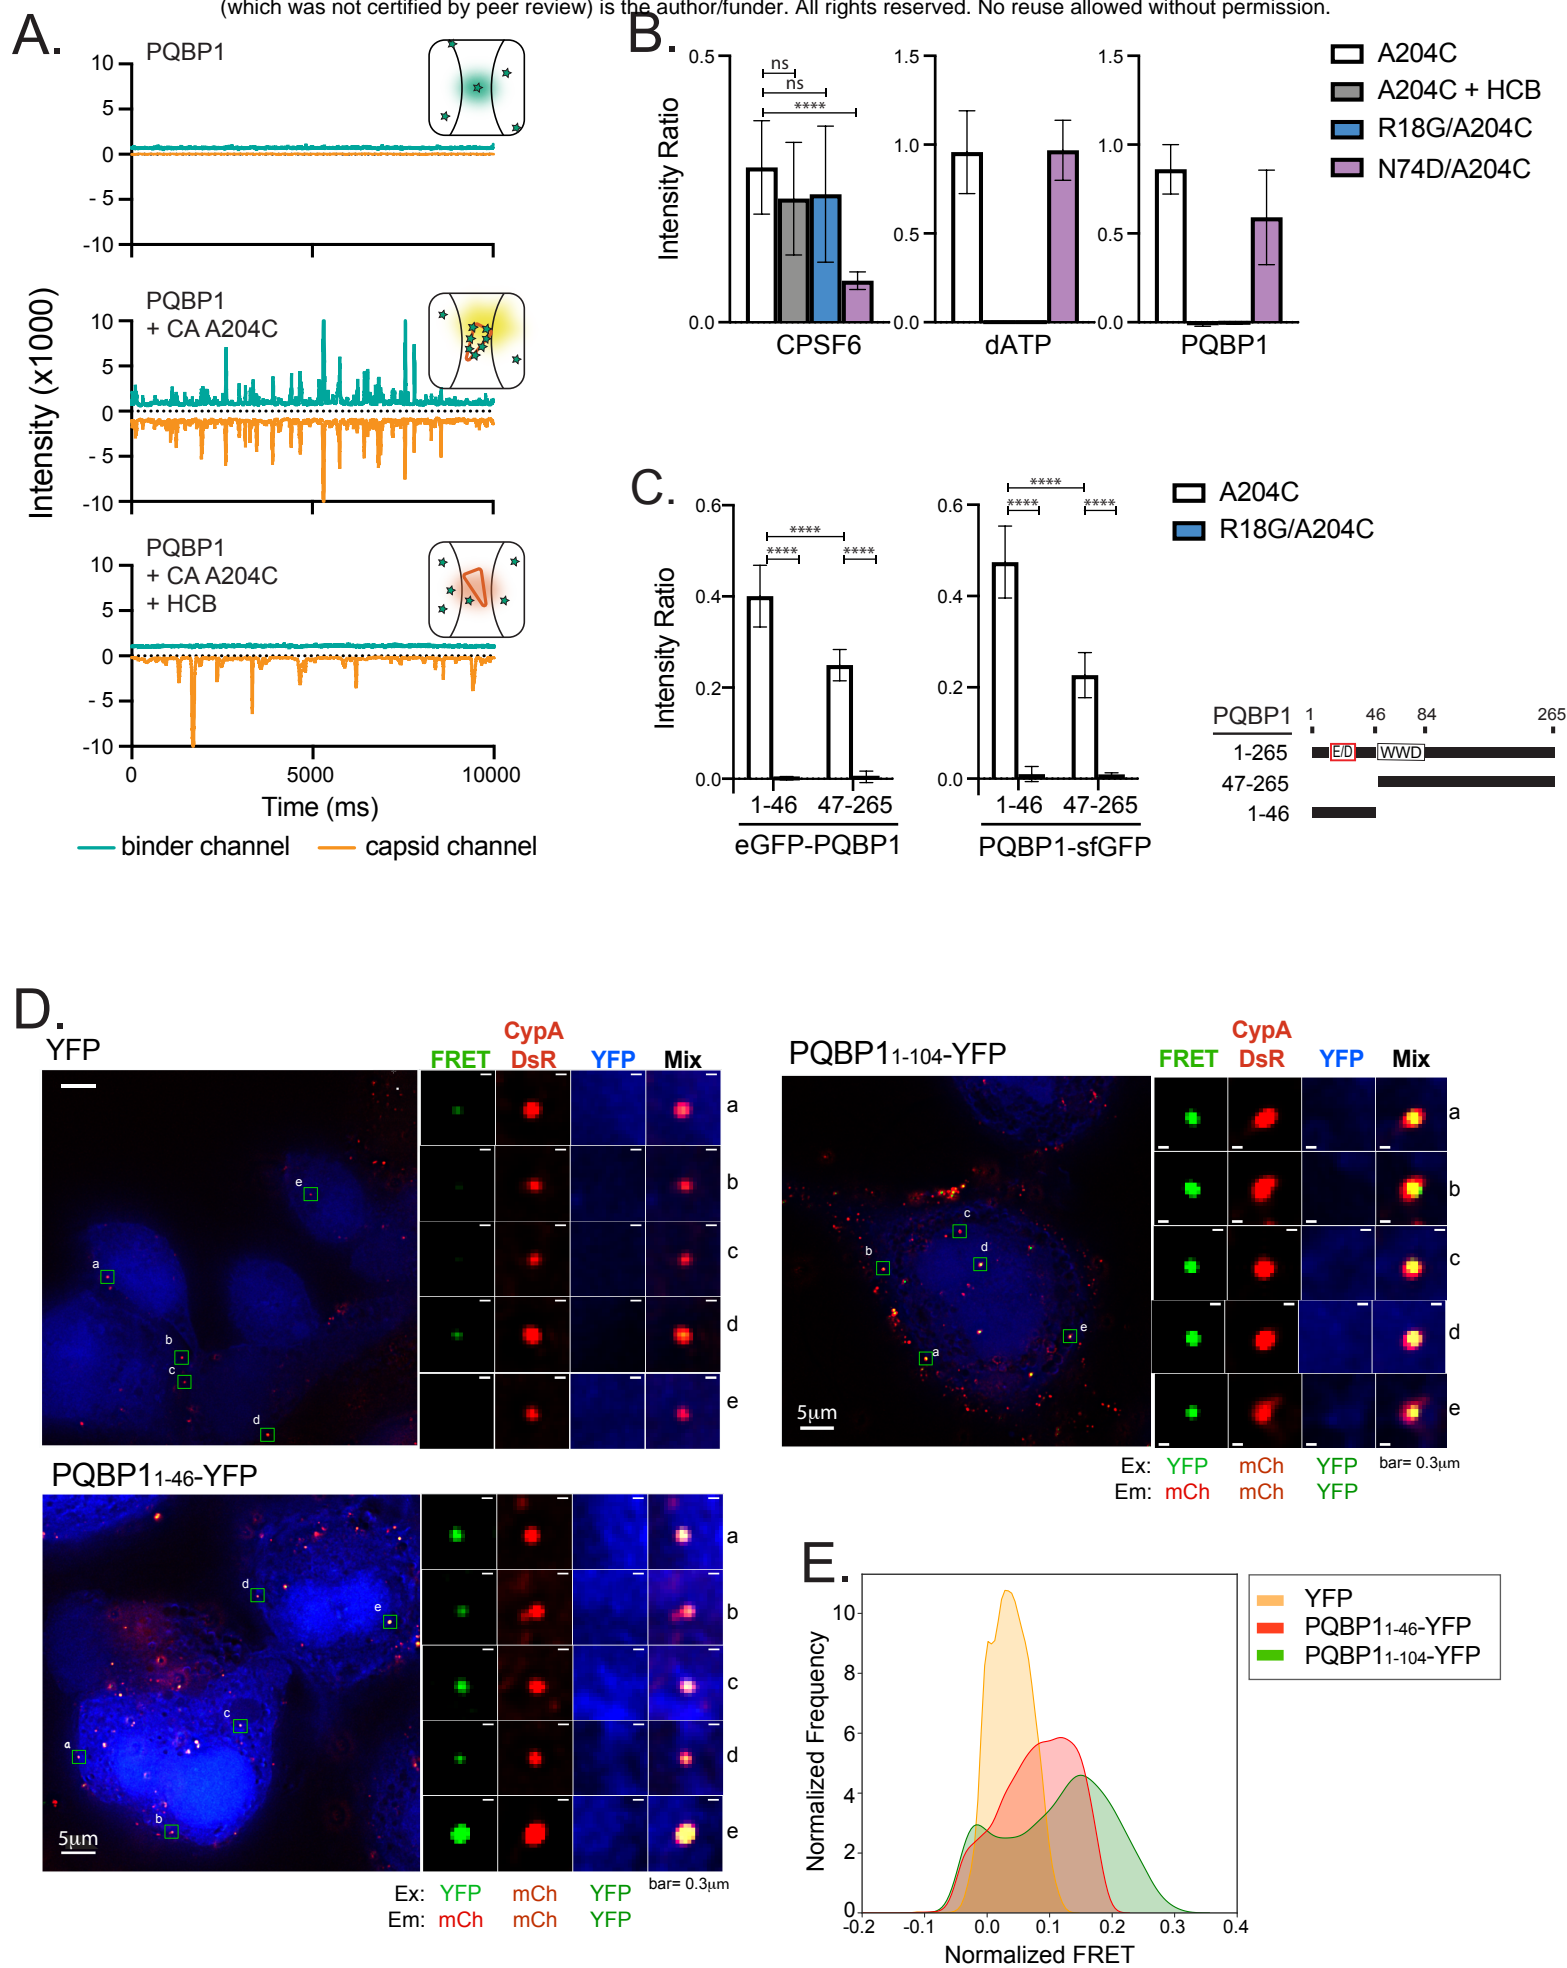

Figure 2

A.

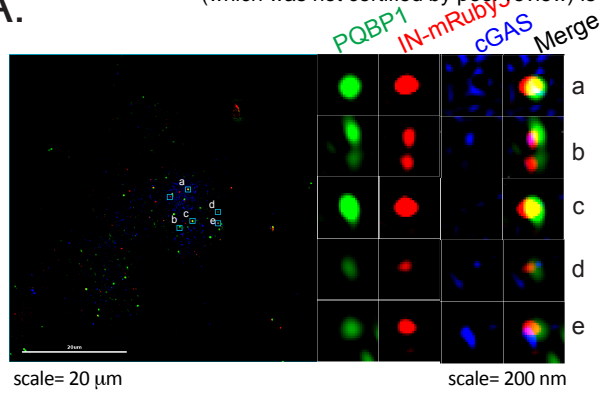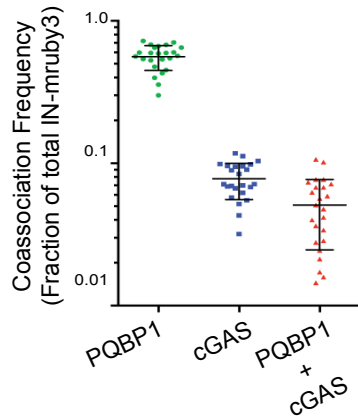

B.

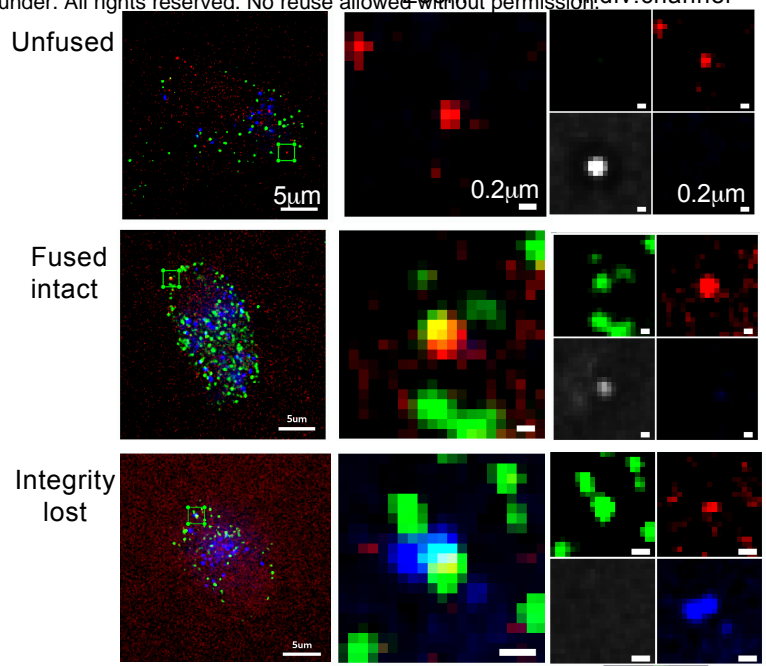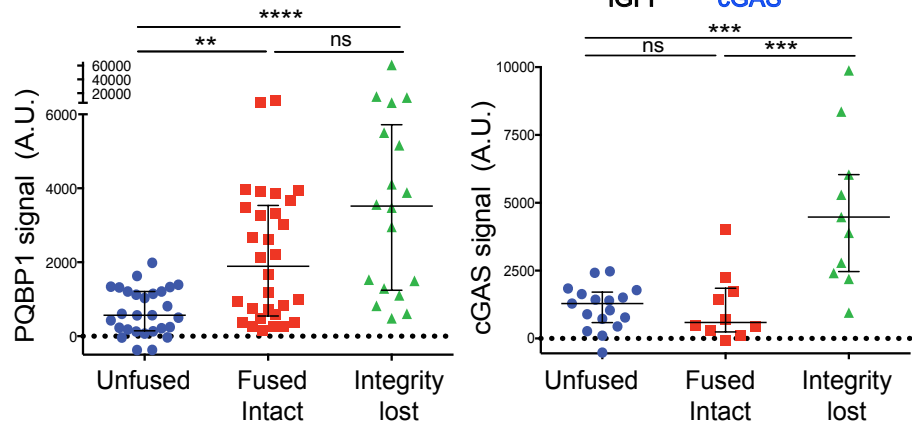

C.

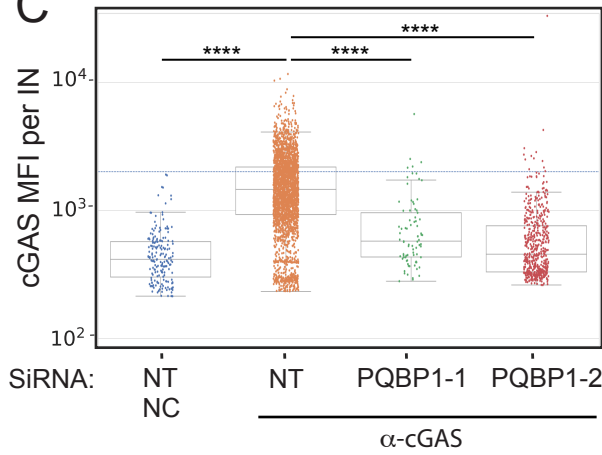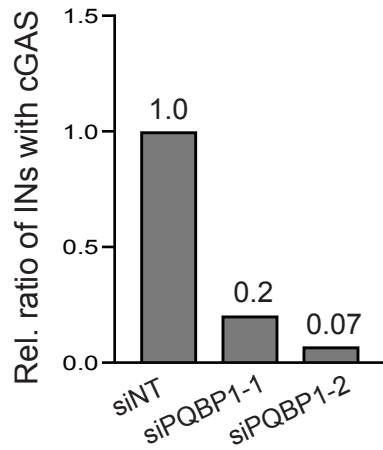

D.

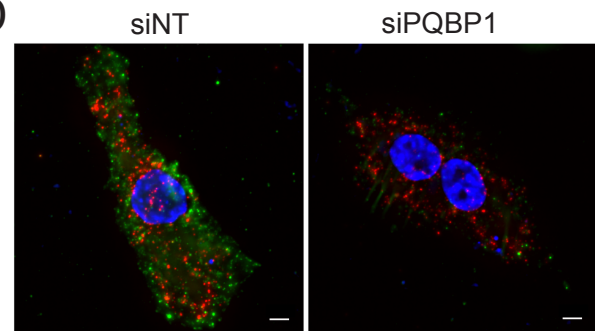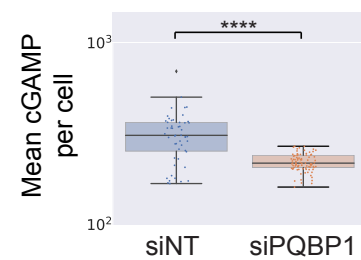

Figure 3

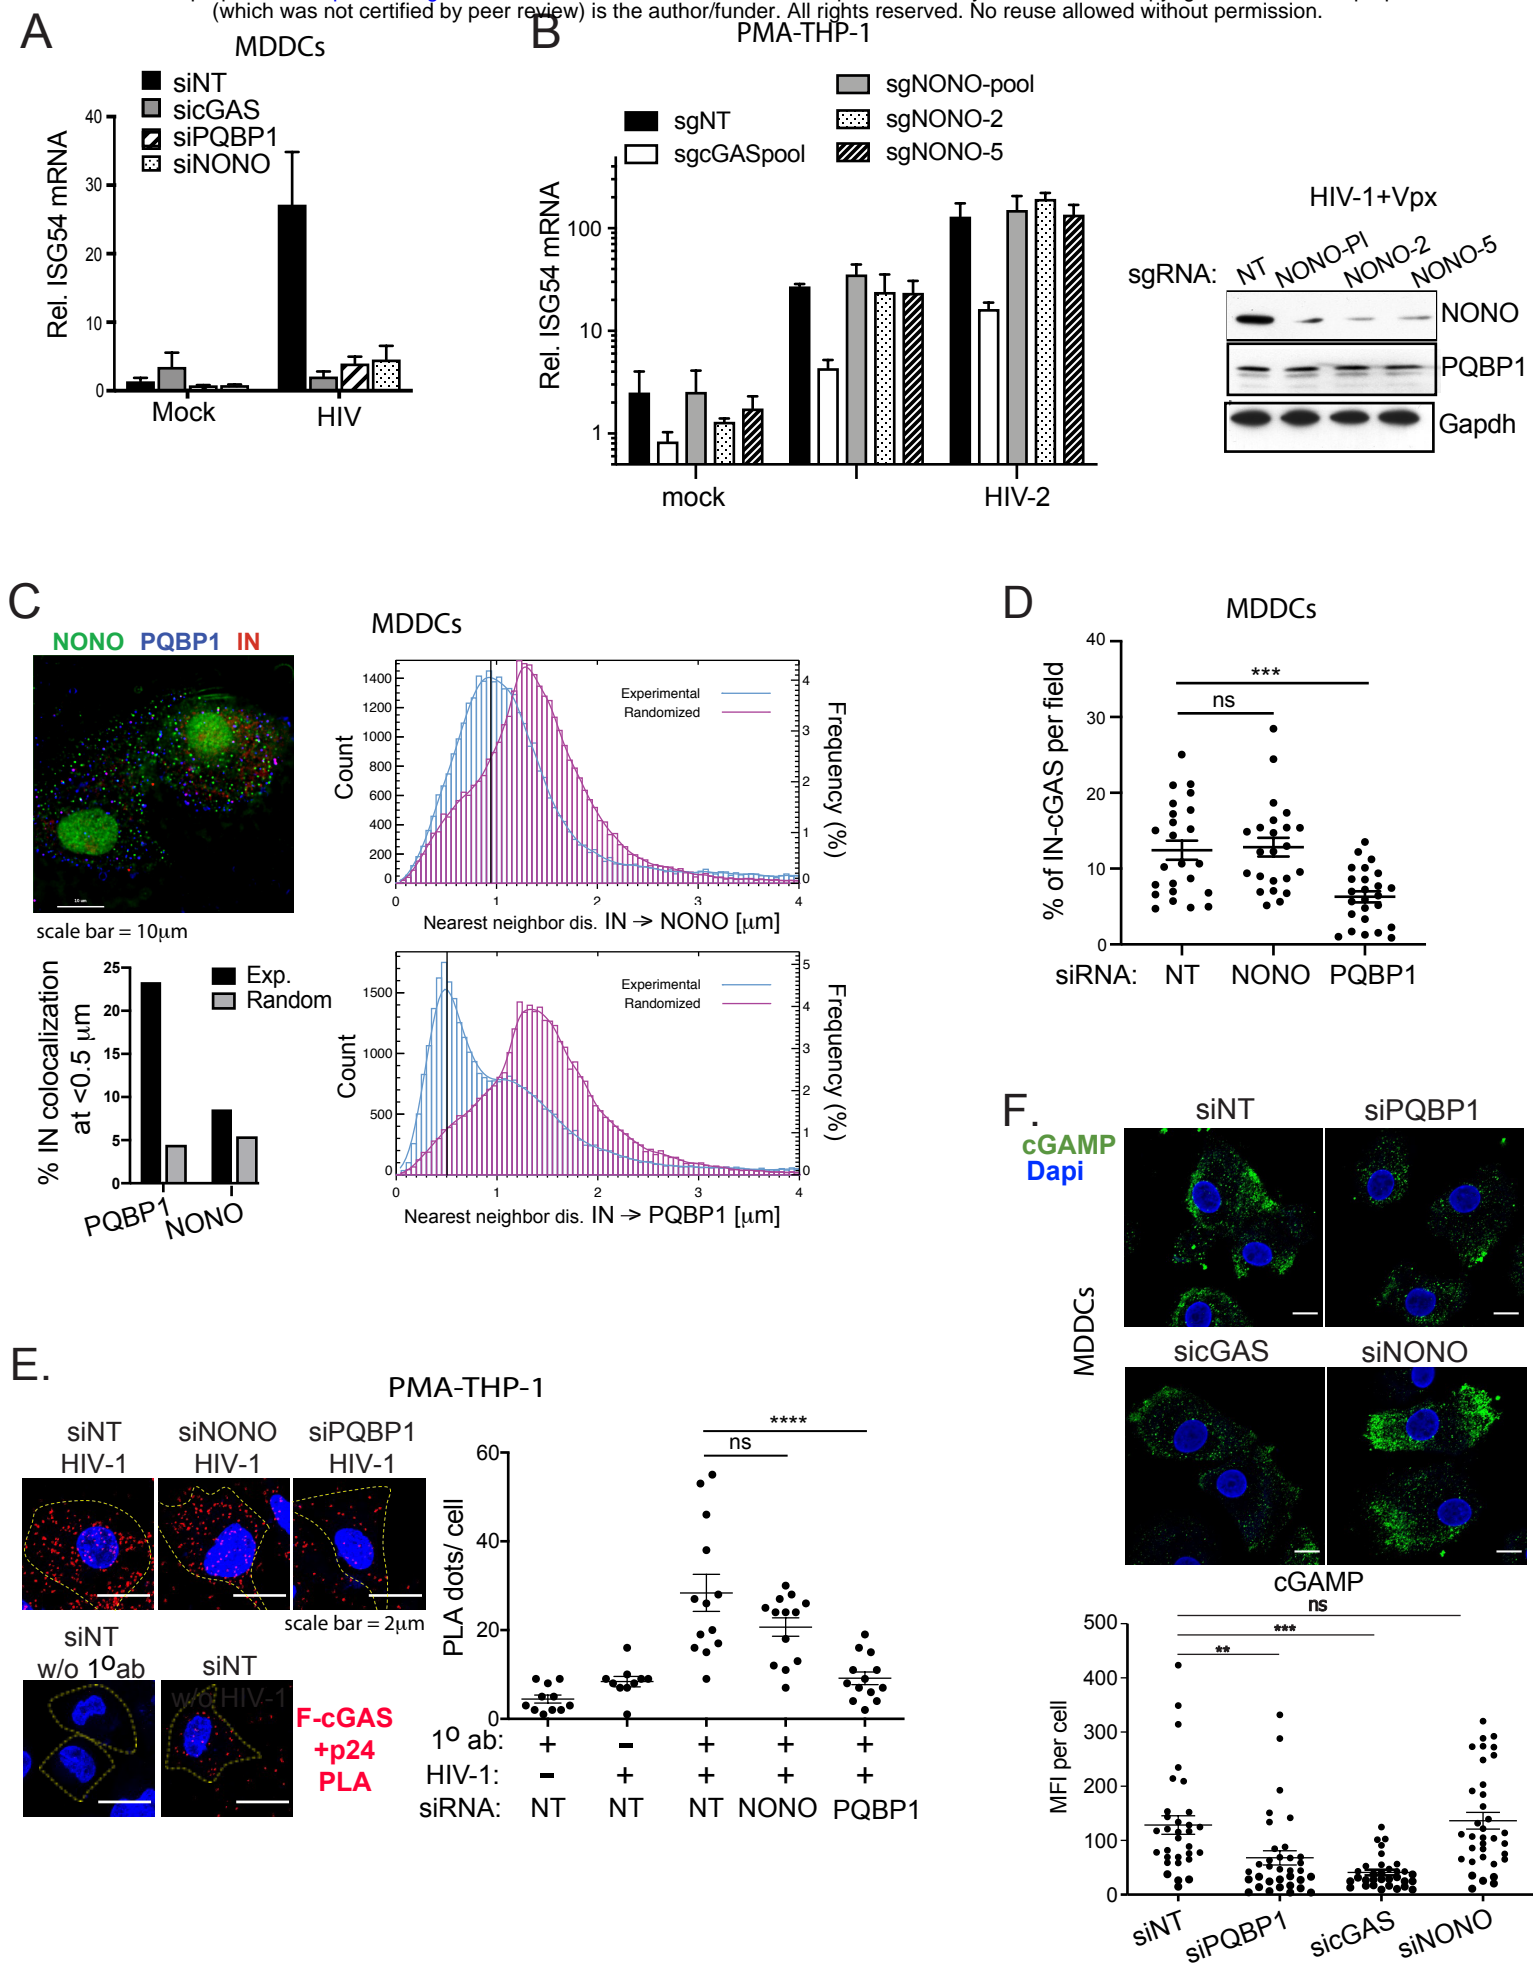

Figure 4

A.

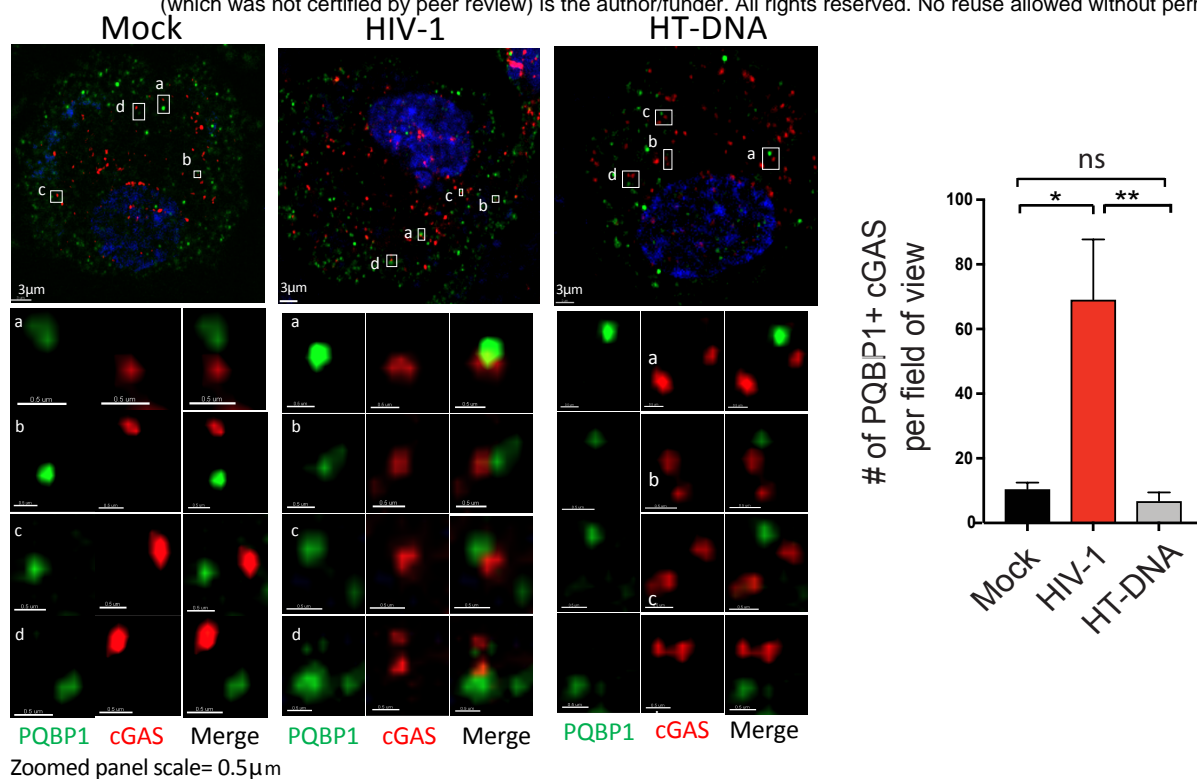

B.

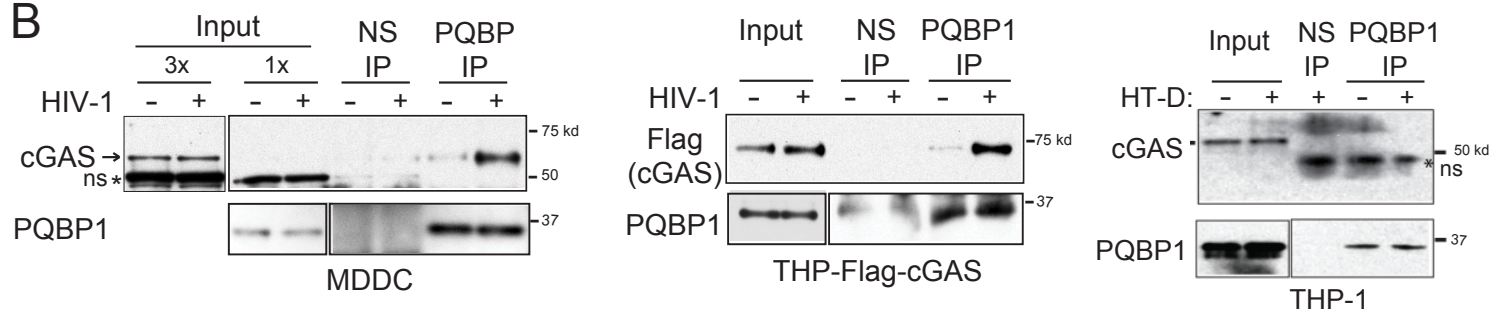

C.

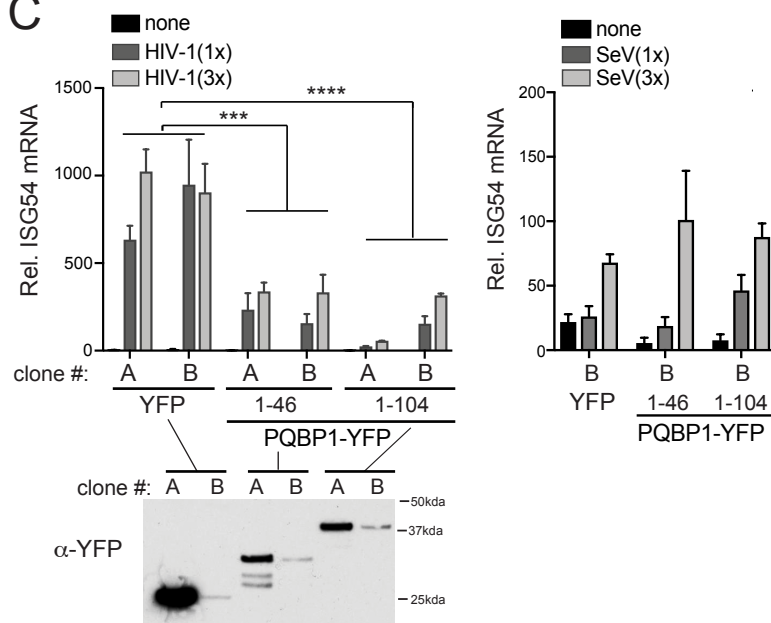

D.

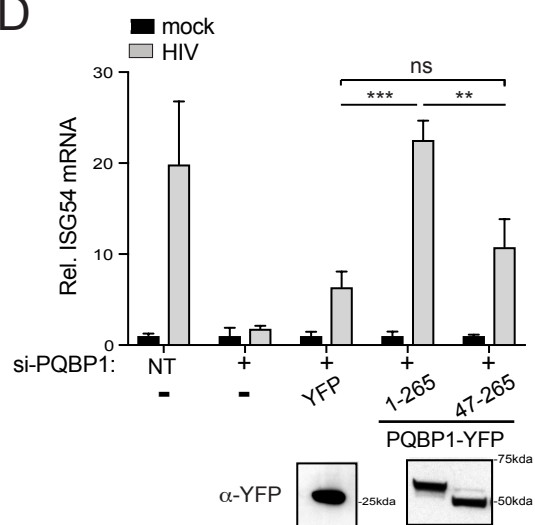

## SUPPLEMENTAL TEXT

**PQBP1 and IN distance distribution analysis.** To assess the association, we analyzed the distances,  $d$ , from each IN to the nearest PQBP1 spot. The probability distribution of nearest neighbor distances,  $P(d)$ , shows a strong peak around  $d=0.125 \mu\text{m}$ , and a broader and weaker peak around  $d=0.7 \mu\text{m}$  (blue; left, Figure S1D). These two peaks likely represent two different aspects of protein localization. To distinguish between stochastic protein localization and biologically relevant colocalization, we manipulated the positions of IN and PQBP1 *in silico*. First, we randomized the labels, shuffling IN and PQBP1 spots together while keeping the density and IN/PQBP1 ratio constant. After label randomization,  $P(d)$  presents a single broad peak around  $d=0.75 \mu\text{m}$  (purple; left, Figure S1D). Next, we added a random uniform jitter  $J$  to PQBP1 positions and calculated  $P(d)$ . We find that any added jitter weakens the narrow peak at  $d=0.125 \mu\text{m}$  in favor of the peak at  $d=0.75 \mu\text{m}$ . At  $J=1 \mu\text{m}$  the jittered curve (yellow; left, Figure S1D) overlays of the randomized curve. One way to quantify colocalization is to calculate the percentage  $\phi$  of IN spots that have a PQBP1 within a chosen threshold,  $\delta$  (right, Figure S1D). Formally,  $\phi$  is defined by  $\phi(J, \delta) = 100 \int_0^\delta P(d, J) dd$ . A reasonable value for  $\delta$  accounts for the optical aberrations, which can be wavelength dependent. While the two fluorophores may be physically very close, their image on a microscope could be shifted and deformed. The safest way to proceed is then to choose a reasonable value for  $\delta$  and calculate the colocalization using that threshold. Finally, the resistance to one's findings to small variations in  $\delta$ , known as sensitivity analysis, can be used to support the original choice of parameter. We plot  $\phi$  as a function of jitter  $J$  and note that for the reasonable values of  $\delta$  ( $0.1 \mu\text{m} < \delta < 0.75 \mu\text{m}$ ), the dependence of  $\phi$  on  $J$  follows a similar behavior, implying that  $\delta$  is robust against small changes. The biphasic decrease in  $\phi$  again indicates the presence of two aspects of protein colocalization. We note that the step in  $\phi$  happens when  $J \sim \delta$ . This does not occur when the labels are randomly shuffled, indicating that once the



jitter exceeds the nearest neighbor distance, the colocalization is destroyed in real data, but not in randomized shuffling on acquired data. Collectively, the distance analysis confirmed a robust co-localization between PQBP1 protein and incoming virions (above 40% at  $\delta$ , = 0.5  $\mu\text{m}$ ) that is not measured due to random distribution of cellular PQBP1.

## SUPPLEMENTAL LEGENDS

### Figure S1. PQBP1 association with incoming HIV-1 virus particles.

(A) Specificity of PQBP1 antibody (Sigma) and lack of effect on overall cGAS expression was confirmed by IF and/or western blot of THP-1 cells expressing indicated shRNAs (top) or MDDCs treated with indicated siRNAs (bottom). (B) Identification of viral particles from infected THP-1 cells was done with python with skimage, scipy, pims, and trackpy tools. In short, cells were subjected to a binary threshold so that no extracellular signals (viruses or cell debris) would confound the analysis. Viral particles were detected using thresholding and watershed segmentation methods or by using trackpy. The masks of the pixels that are positive for viral particles are then quantified for each independent channel (PQBP1, cGAS, iGFP, IN label, etc) and (C) for each field of view that was imaged, fraction of total virions (IN) showing positive PQBP1 signal (compared to secondary antibodies-only controls) were graphed. (D) Quantification of PQBP1 and IN distance distribution analysis. Left, probability distribution of distances,  $P(d)$ , from each virion (IN) to the nearest PQBP1 (blue).  $P(d)$  for uniformly distributed jitter  $J=1 \mu\text{m}$  (yellow) becomes similar to the distribution obtained by random shuffling of puncta (purple). Arrows indicate reasonable arbitrary thresholds  $\delta$  to be applied to  $d$  values in determining association of PQBP1 puncta with corresponding IN. Data were obtained from 24 independent images (N=24,471). Right, the percentage of IN spots that have a PQBP1 within a chosen threshold,  $\delta$  ( $0.1 \mu\text{m} < \delta < 0.75 \mu\text{m}$ ). See Supplemental Text for detail.

### **Figure S2. Mapping of capsid interaction domain in PQBP1.**

(A) PQBP1<sub>1-46</sub> and PQBP1<sub>47-265</sub> with N-terminal eGFP or C-terminal sfGFP produced in a cell-free protein expression mixture before (left) and after (middle) purification by Ni-NTA chromatography followed by dialysis. Recombinant PQBP1 was labelled at C60 with AF488-maleimide (right). (B) Dual-color fluorescence traces of a negative control GFP (green traces) with AF568-labelled CA A204C particles (orange traces). (C) Top panels, representative fluorescence traces of either AF488 labelled PQBP1, CPSF6 peptide or dATP (red traces) and the CA A204C particles (blue traces). Inclusion of hexacarboxybenzene (HCB) or use of either N74D or R18G double mutants with CA A204C is indicated. Bottom panels, analogous to the top, except eGFP fused PQBP1 truncation constructs were utilized. (D) Fluorescence resonance energy transfer (FRET) assay to measure interaction between PQBP1<sub>1-46</sub>-YFP and CypA-dsRed. THP-1 cells either wild type or stably expressing either eYFP, PQBP1<sub>1-46</sub>-eYFP or PQBP1<sub>1-104</sub>-eYFP were infected with HIV-1 virus packaged with CypA-DsRed for 1.5 hrs, followed by PFA fixation and FRET analysis. Signal intensity distribution of CypA-dsRed positive foci for indicated THP-1 clones infected with the virus (left) and a western blot depicting expression of both eYFP and PQBP1-eYFP proteins are shown.

### **Figure S3. PQBP1 is required for cGAS recruitment to incoming virus particles.**

(A) The specificity of cGAS antibody was confirmed by IF and western blot on cGAS knock out in THP-1 cells. (B) Time lapsed imaging to monitor the structural integrity of an incoming viral core. MDDCs are infected with HIV-1 virus with iGFP fluid phase marker (iGFP+IN-mRuby3 at low MOI) where iGFP and IN-mRuby signal intensities of each virion were monitored for one hour. See Video S1. A representative kinetic profile of the signal intensities of a virion at different stages where the loss of GFP signal linked to virion fusion and capsid integrity loss are depicted (top). Panels of each virion, identified by both time-lapsed and corresponding IF x-y-z position of the respective foci point label was categorized based on the capsid integrity status and are color coded for the signals of PQBP1 (green), cGAS (blue), IN-mRuby3 (red). The RGB

merged images and iGFP (gray in the individual boxes) are also shown (middle, particle B to G). 3D reconstruction of point E and point F foci are shown where we see the proximity and overlapping of PQBP1/cGAS complexes to the viral particle. (C) A knock down efficiency of siRNAs against PQBP1 is demonstrated by both RT-qPCR and IF analysis (left and right respectively). MFI of cGAS signal intensity per THP-1 cell treated with either non-targeting (NT) or PQBP1 specific siRNAs and infected with HIV-1 virus as described in Figure 3C. Mean and error bar ( $\pm 1.5 \times \text{IQR}$ ) are shown. Boxes denote the interquartile range. T-test (two-tailed, equal variation),  $*p < 0.05$ ; Dunn's column comparison \*\*\*\*  $p < 0.0001$ , \*  $p < 0.05$ . (D) Increase in cGAMPs in the cytosol of the infected cells. PMA-THP-1 cells, either mock infected or infected with HIV-1 luciferase virus or transfected with either HT-DNA or cGAMP for 3 hours, were stained for cGAMP (green), p24 (red), IRF3 (magenta) and dapi (blue). The white contour line indicates the boundary of nucleus. (E) Knockdown of PQBP1 results decreased cGAMP production. Left, PMA-THP-1, transfected with non-targeting siRNAs (NT) or siRNA targeting PQBP1, were challenged with HIV-1, stained for cGAMP (green), cGAS (red), and dapi (blue). Right, knockdown efficiencies of both mRNA and protein level of PQBP.

**Figure S4. NONO is not required for the PQBP1-dependent cGAS sensing occurring during the early step of the infection.** (A) PMA differentiated THP-1 cells, subjected to siRNA-mediated targeting were infected with were with either mock of HIV-1 in the presence of VLP-Vpx for 2 hrs, followed by post-fixation IF imaging. The level of NONO and PQBP1 proteins of the indicated THP-1 cells (top) and expression levels of Flag-cGAS (red), p24 (green) and Dapi (blue) of the cells utilized for proximal ligation assay as in Figure 4 (bottom) are shown. (B) Knockdown efficiencies of siRNA-targeted genes in MDDCs were quantified by RT-qPCR. (C) MFIs of cGAS signal per infected MDDC, subjected to indicated siRNA treatments, are shown. A table at the bottom of the graph shows # of INs analyzed for each condition. (D) Representative images of the infected MDDCs having treated with indicated siRNAs (left) and MFI of indicated protein

signals per cells (right) analyzed in Figure 4D and 4F are shown. Mean and SEMs are shown. One-way ANOVA, \*\*\* $p < 0.001$ , \*\* $p < 0.01$ , \* $p < 0.05$ . ns denotes no significance.

**Figure S5. N-terminal capsid interaction domain of PQBP1 is dispensable for cGAS interaction.** Either full-length or truncated PQBP1-YFP proteins were co-expressed with MBP-cGAS in 293T cells and subjected to anti-MBP pull down. \*ns denotes non-specific protein. A schematic of PQBP1 protein is shown. WWD and E/D denote ww domain and acidic aa rich domain respectively.

### **Video S1.**

**Time-lapse imaging to monitor structural integrity of an incoming viral particle with iGFP fluid phase marker (iGFP+IN-mRuby3) in MDCCs. See Figure S3B for detail.**

**A**

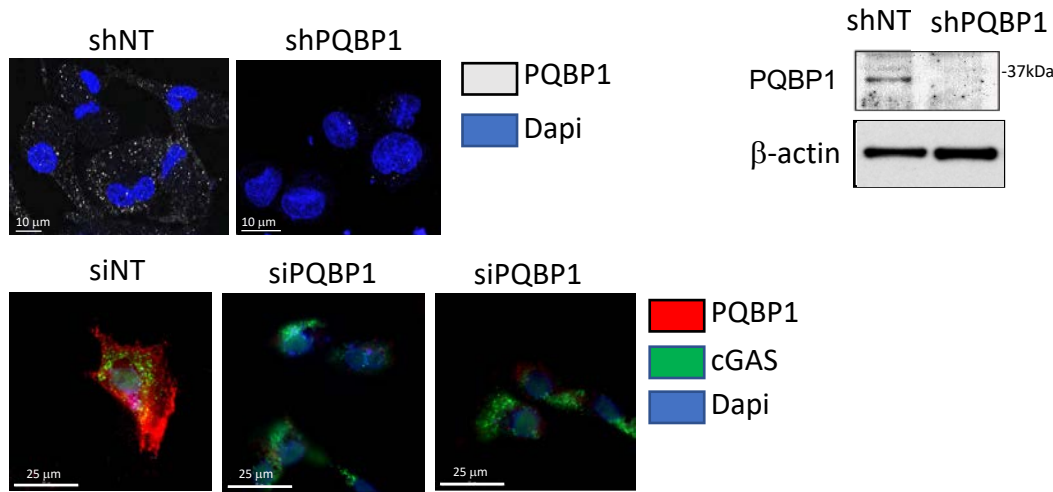

**B**

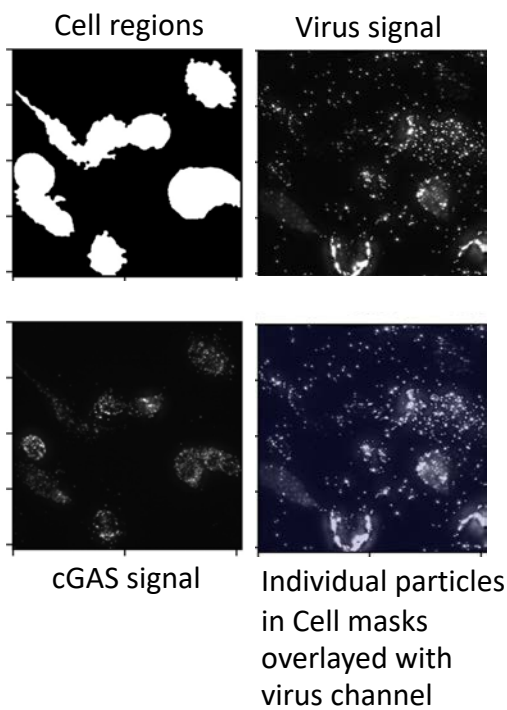

**C**

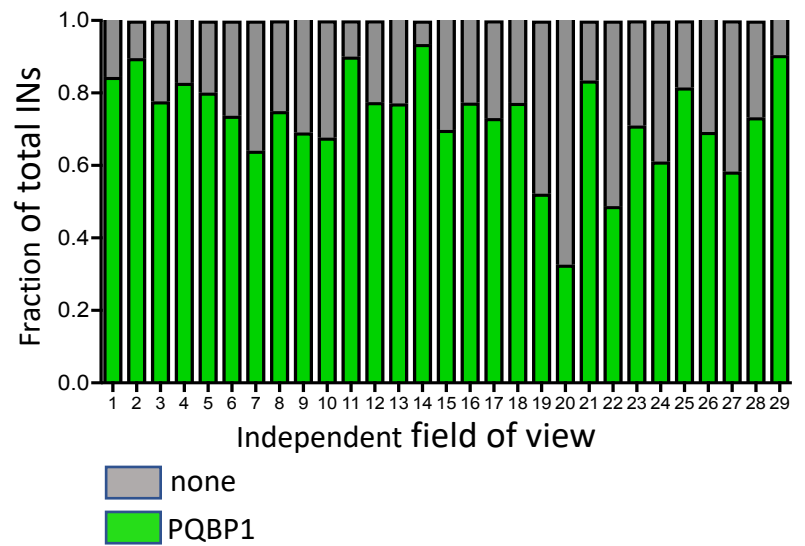

**D**

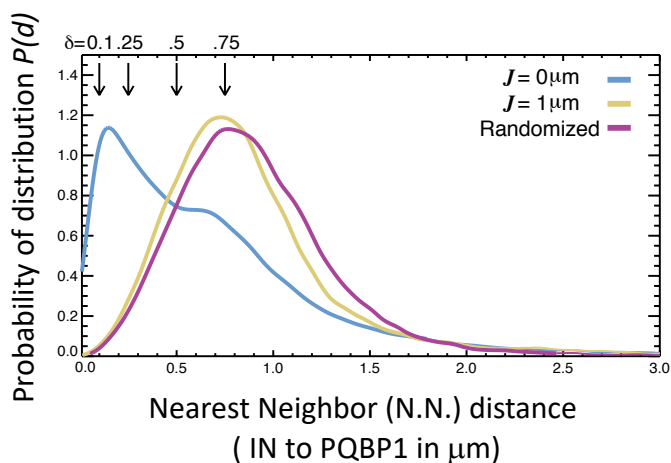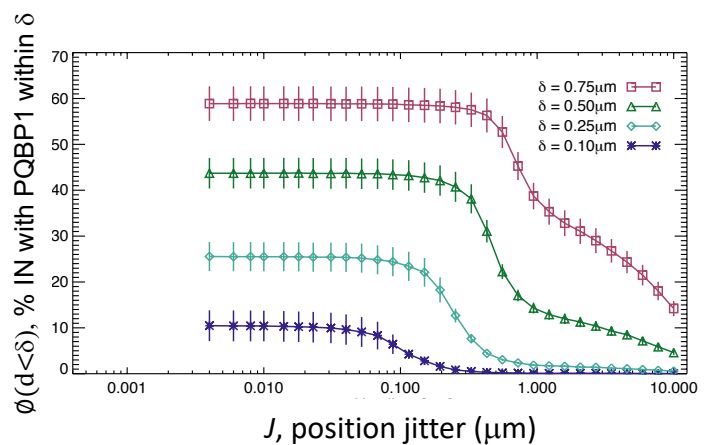

Figure S1

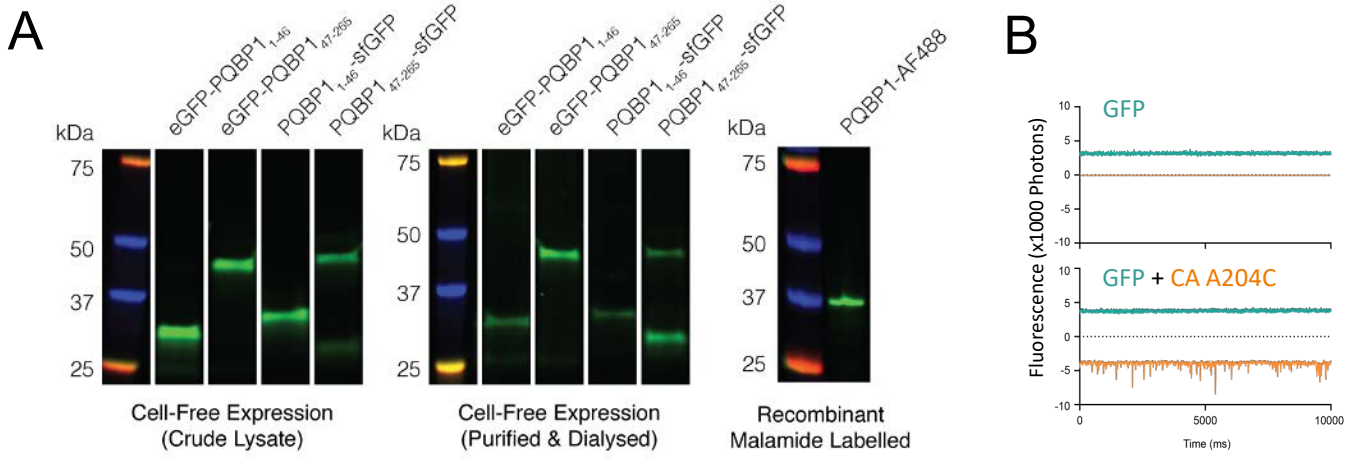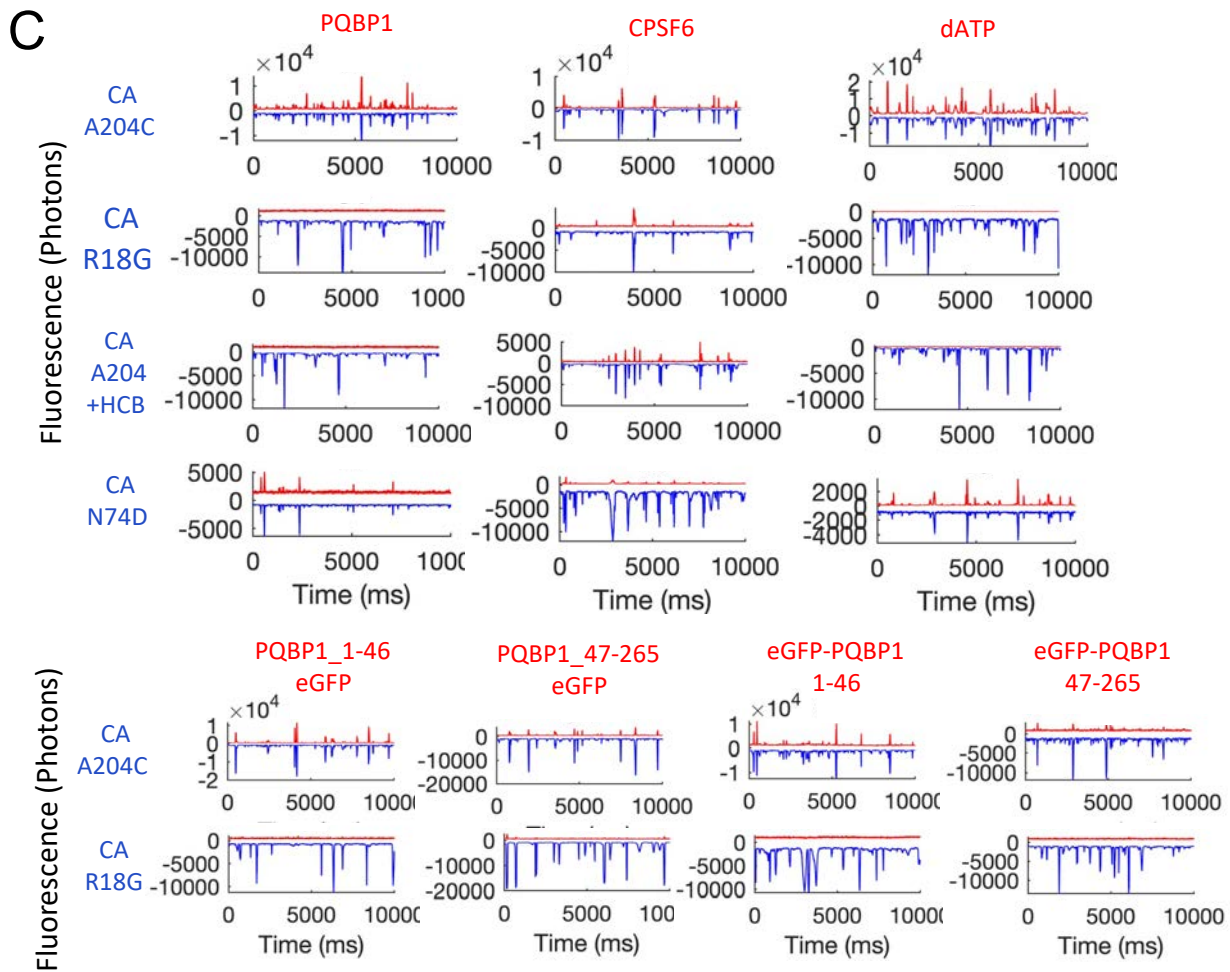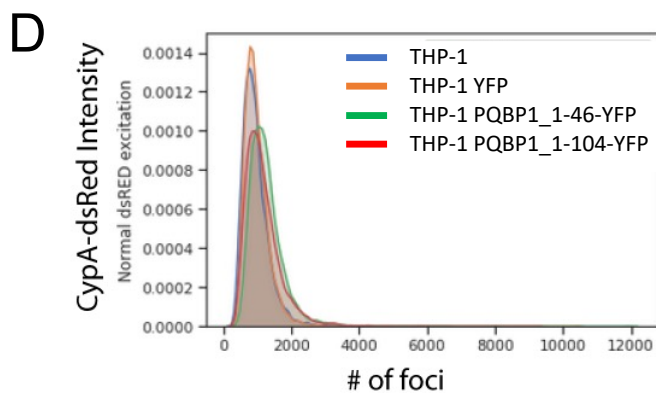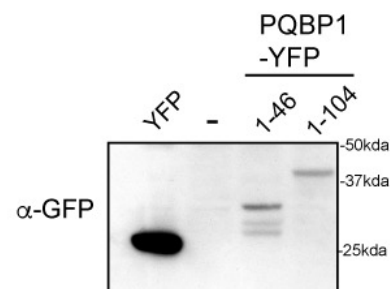

Figure S2

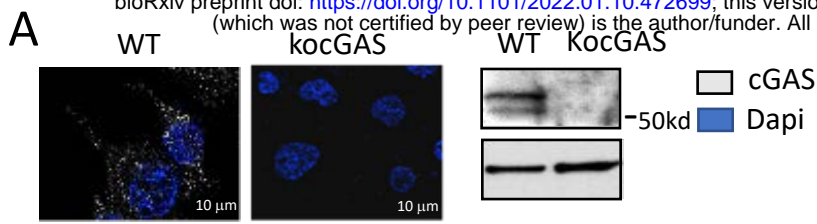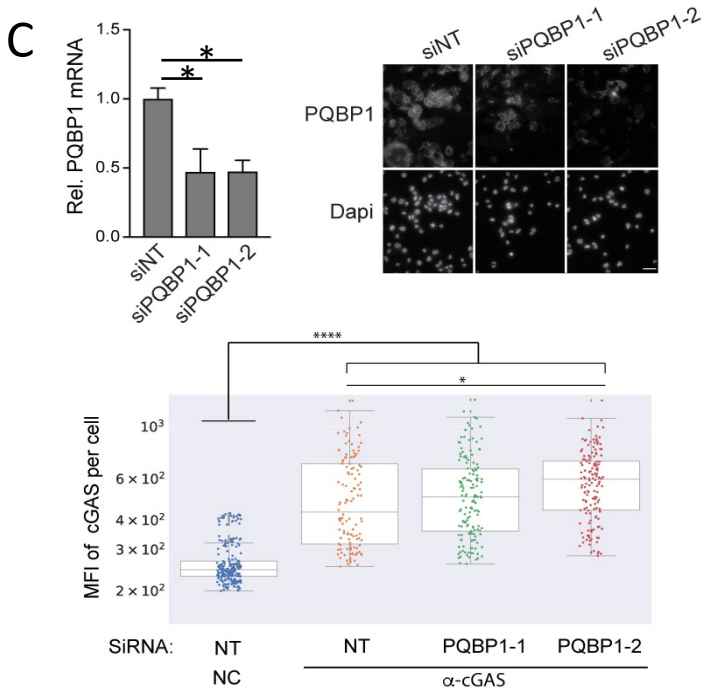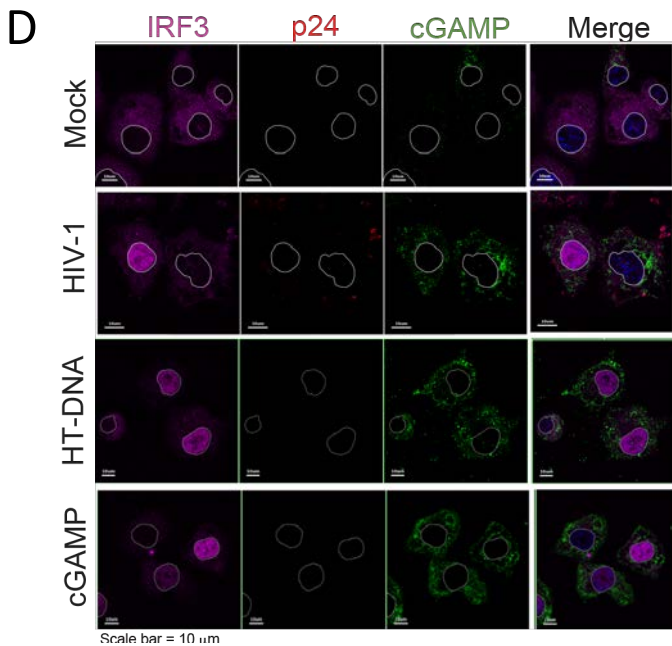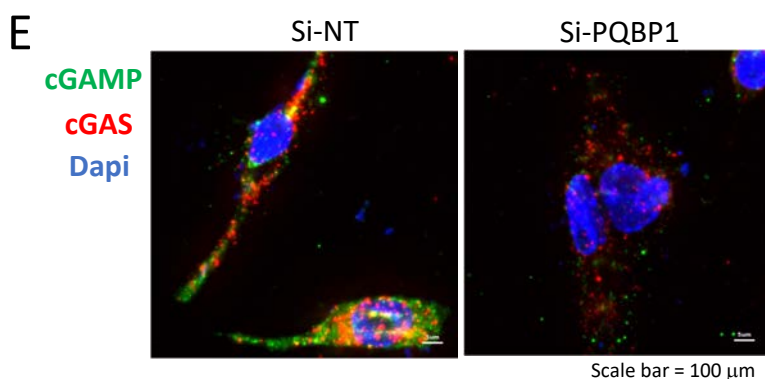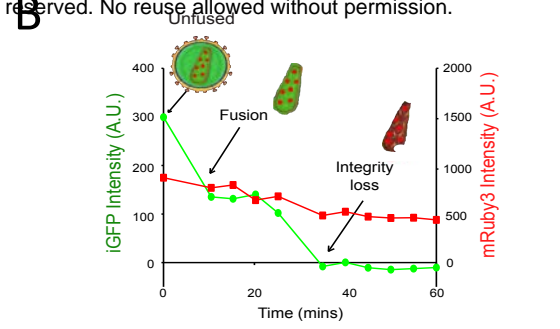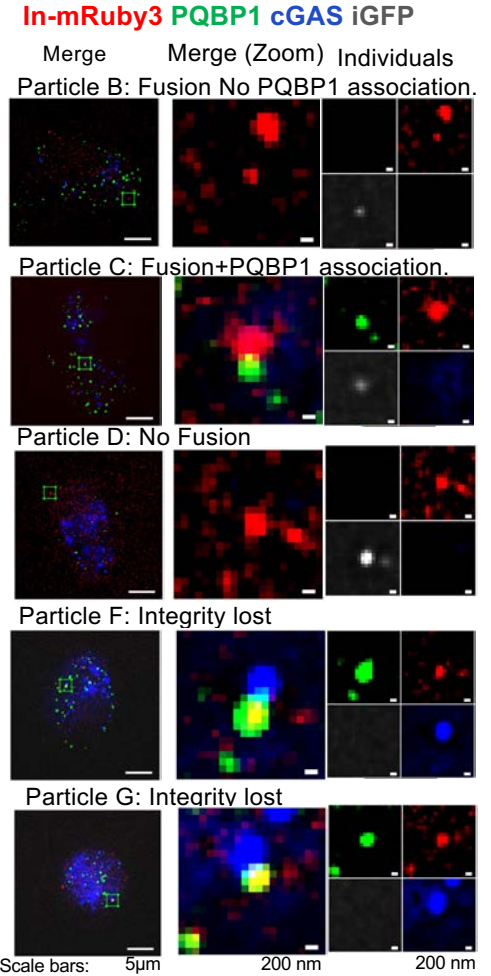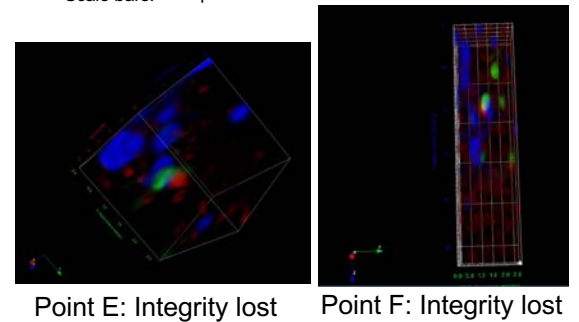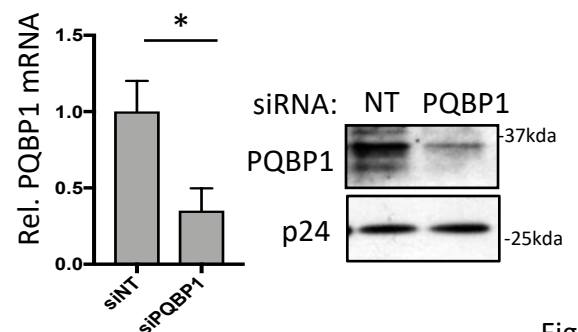

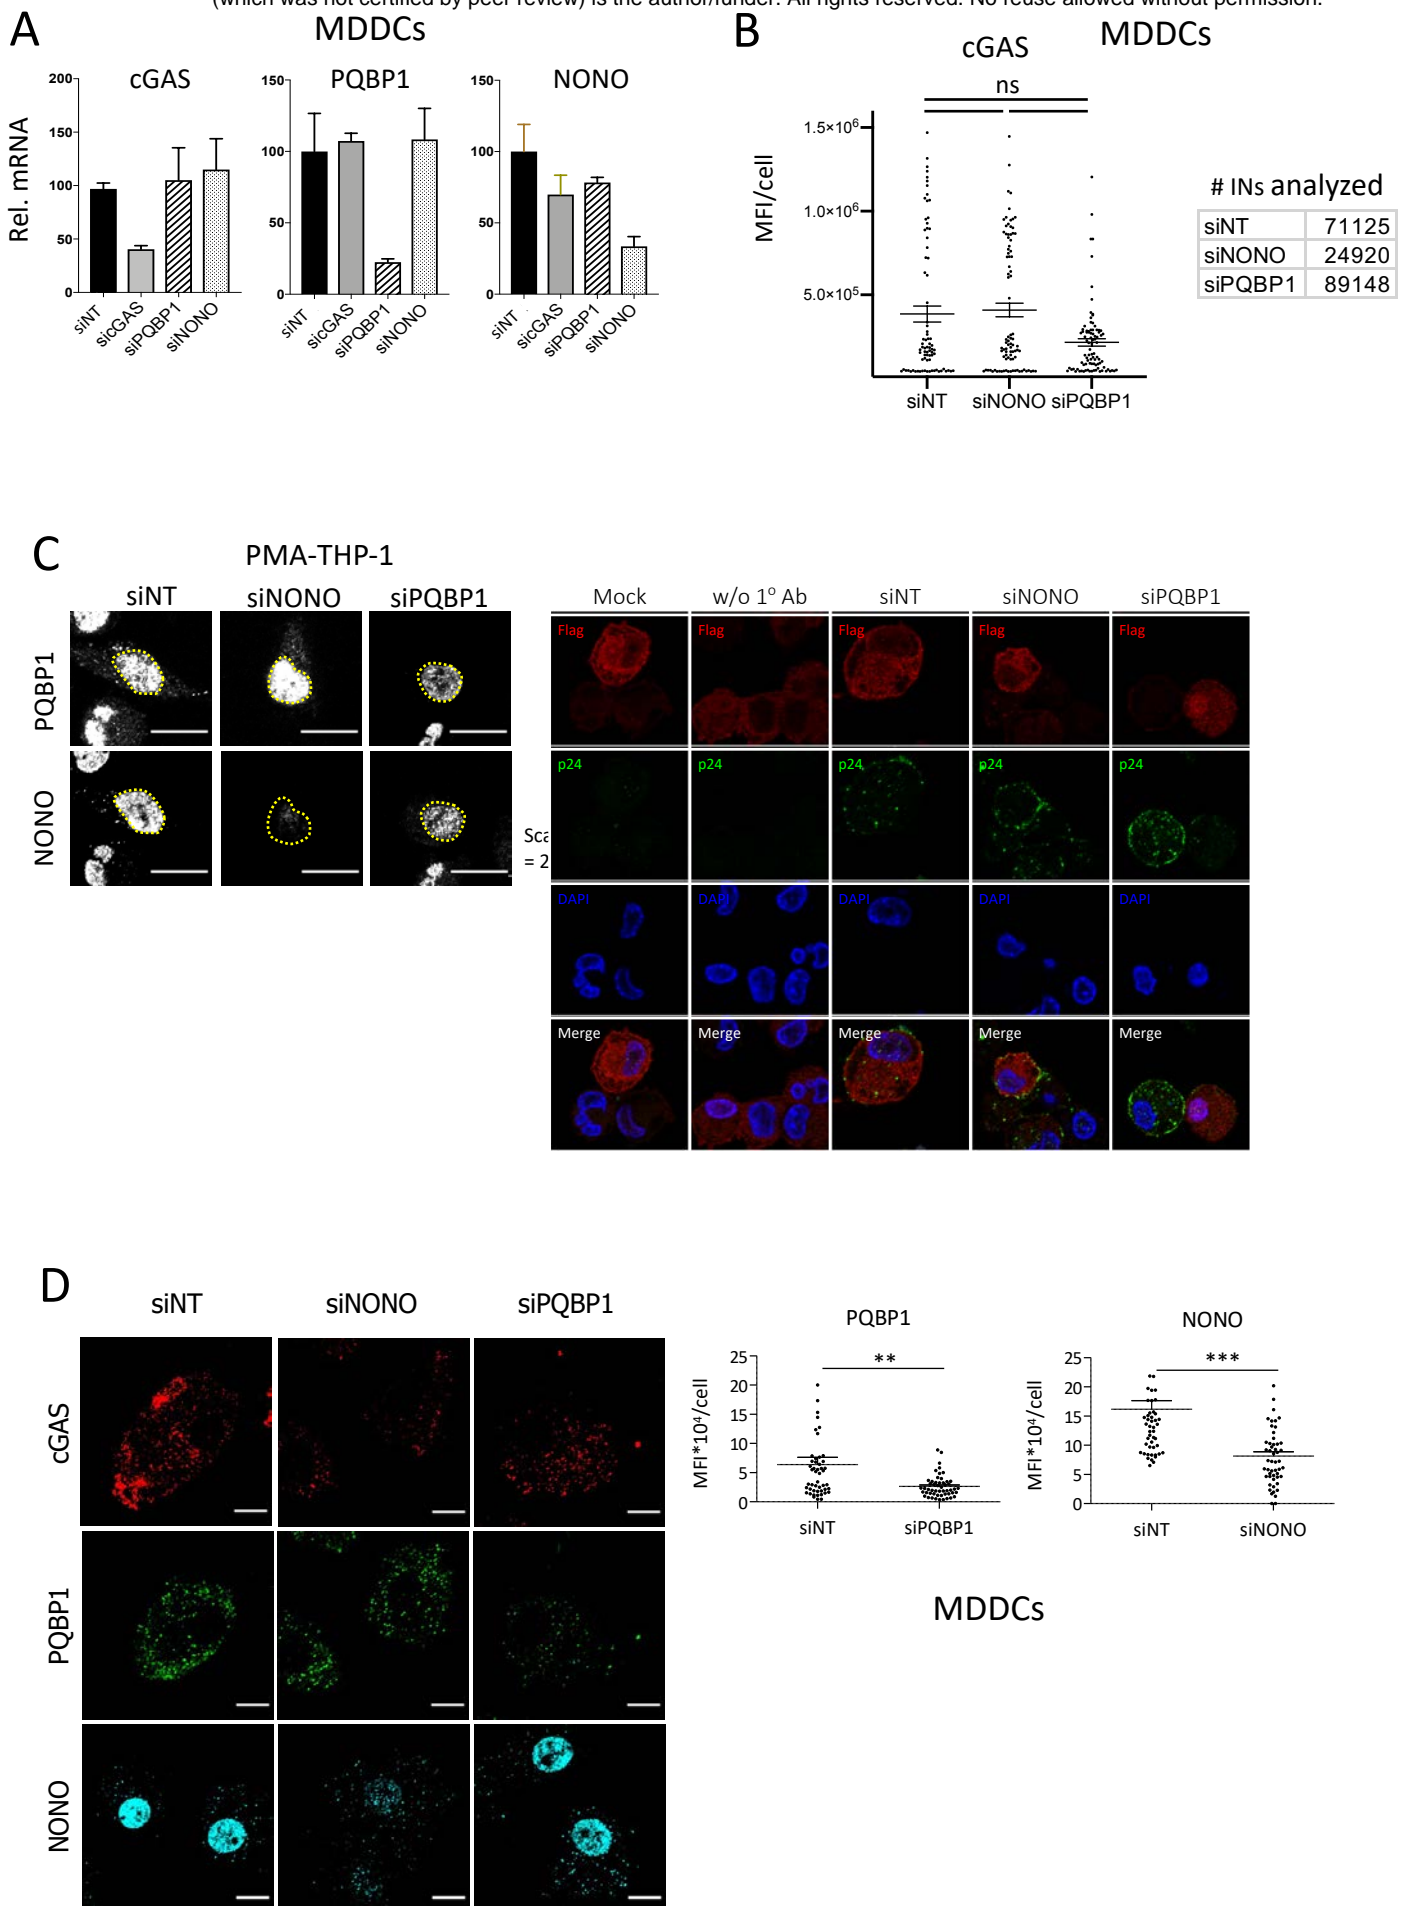



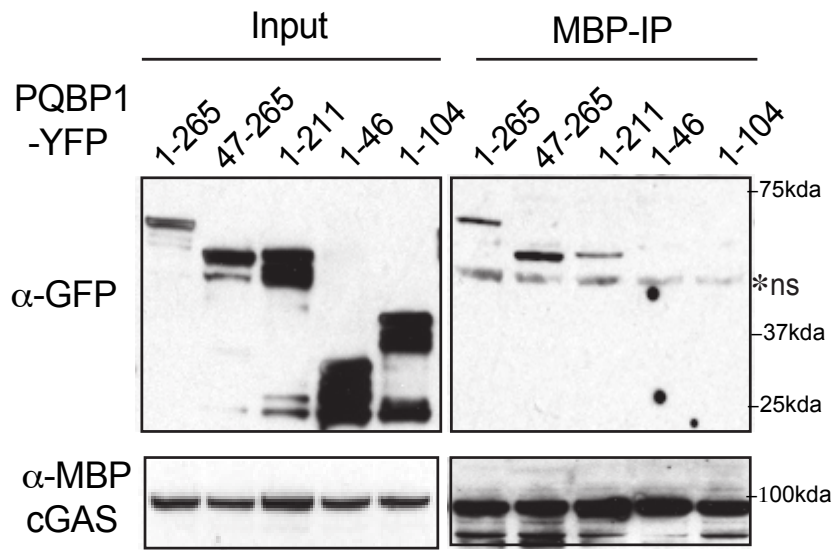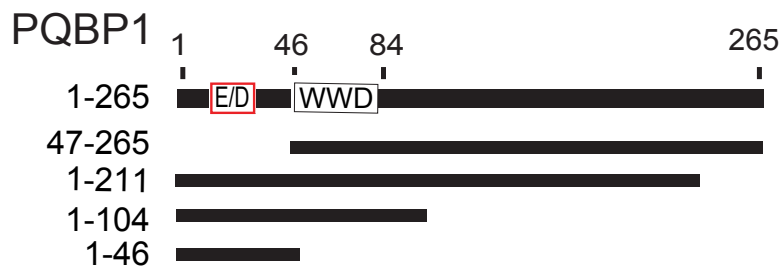

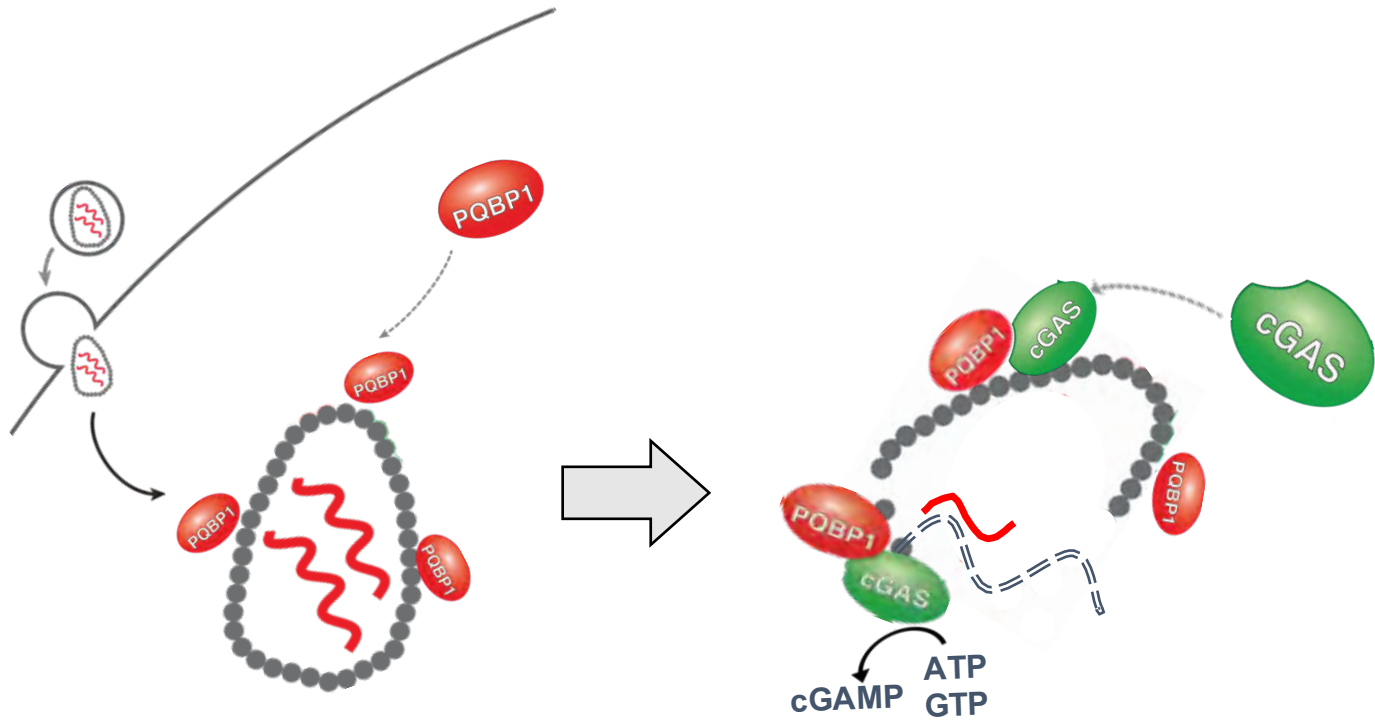

-  HIV-1 capsid
-  HIV-1 DNA
-  HIV-1 RNA

- Initiation of capsid disassembly
- Reverse transcription
- Innate sensing
